# Supplementary material
Source: PubMed Central journal article supplement (PMC6677656)
Supplement: NIHMS1026081-supplement-SupplementalMaterial.pdf [file NIHMS1026081-supplement-SupplementalMaterial.pdf]

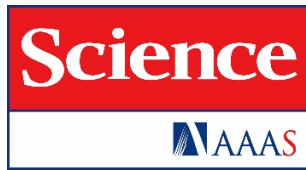

## Supplementary Materials for

### DNA Fragility in the Parallel Evolution of Pelvic Reduction in Stickleback Fish

Kathleen T. Xie, Guliang Wang, Abbey C. Thompson, Julia I. Wucherpfennig, Thomas E. Reimchen, Andrew D. C. MacColl, Dolph Schluter, Michael A. Bell, Karen M. Vasquez, and David M. Kingsley

correspondence to: [kingsley@stanford.edu](mailto:kingsley@stanford.edu)

**This PDF file includes:**

Materials and Methods  
Figs. S1 to S11  
Tables S1 to S6

## Materials and Methods

### Stickleback collection and care

A list of stickleback populations used and collected in this study is provided (table S6). Sticklebacks were captured using minnow traps or small minnow seines in less than 1 m deep water within 5 m of lakeshores or small coastal streams. Most marine sticklebacks were reproductive adults that were captured in freshwater, into which they ran to breed. All animal studies were performed in accordance with the recommendations in the Guide for the Care and Use of Laboratory Animals of the National Institutes of Health, using protocols approved by the Institutional Animal Care and Use Committee of Stanford University (IACUC protocol #13834), in animal facilities accredited by the Association for Assessment and Accreditation of Laboratory Animal Care International (AAALAC).

### Primers

Primer sequences are as follows:

Pitx1-128,592.F 5' - CGCCGCTGCGTGAGAATATG  
Pitx1-129,065.F 5' - TGACGGCGGCTCCATCACCGAGCC  
Pitx1-129,067.F 5' - ACGCGGGCGCTCCATCACC  
Pitx1-129,112.F 5' - GCTTGTAAGAAGGGGAACCC  
Pitx1-130,662.R 5' - CCTCAGATCTATCGCAGTAC  
Pitx1-131,376.R 5' - CACAGCGAGCTGCTTTACGG  
Pitx1-131,758.R 5' - TCTCTCAGCGGAGAAATCCG  
Pitx1-132,268.R 5' - AGCTTCGTACGCCACCTG  
ATPA1.F 5' - TGGAACGCTCTGGCCGAAT  
ATPA1.R 5' - TGACGAAGAAAGCTGTGTGGCAT  
T6-NsiI-URA3.F 5' - TTTTTTATGCATCGCGAGGCTGGATGGCCTTC  
T6-NruI-URA3.R 5' - TTTTTTTCGCGATTACTTATAATACAGTTTTTTAG  
ARSH4.F 5' - GATCGCCAACAAATACTACCT  
ARSH4.R 5' - GGATCGCTTGCCTGTAACCT

### Plasmid construction

Plasmids used for two-dimensional gel electrophoresis were constructed by TOPO cloning PCR products into pCR2.1-TOPO (Invitrogen). *Pitx1* enhancer region PCR primers used for RABS, LITC, BDGB, TOAD, and LSHP were Pitx1-129,065.F and Pitx1-131,758.R. Primers used for PAXB, ORPH, and BOUL were Pitx1-129,067.F and Pitx1-131,376.R. The control region used was a section of the ATPA1a gene, using primers ATPA1.F and ATPA1.R. PCR reactions were 200  $\mu$ M dNTPs, 250 nM forward primer, 250 nM reverse primer, 50 mM Tris-HCl, 22 mM  $(\text{NH}_4)_2\text{SO}_4$ , 1.5 mM  $\text{MgCl}_2$ , and 0.1 u/uL Taq polymerase (New England Biolabs) or Expand High Fidelity Polymerase (Roche). High quality fresh genomic DNA preps were essential for successful PCR amplification. Plasmids used to construct yeast artificial chromosomes were derived from pVS20 (32), generously provided by Catherine Freudenreich. Because the stickleback *Pitx1* enhancer sequence contains many AatII recognition sites, AatII was not suitable for linearizing the plasmid. Thus, a NotI site was inserted in the AatII site of pVS20 to create pVS20N (such that the original GACGTC sequence was replaced by GACGTCAGCGGCCGCTGACGTC). To reverse the transcription direction of the *URA3* marker gene, the *URA3* insert was amplified by PCR

from pVS20N using the T6-NsiI-URA3.F and T6-NruI-URA3.R primers and digested with NsiI and NruI. This insert was then ligated into a vector prepared by digesting pVS20N with NsiI and NruI, to create the pVS20NR plasmid (reverse transcription empty vector). To add the replication origin, the ARSH4 origin was amplified by PCR from pRS316 using the ARSH4.F and ARSH4.R primers and inserted into pVS20N at the NruI site to create the pVS20N+ori plasmid (reverse replication empty vector). Stickleback *Pitx1* enhancer sequence was excised using EcoRI from the pCR2.1 constructs described above, and inserted into pVS20N, pVS20NR (reverse transcription), or pVS20N+ori (reverse replication), at the NsiI site, by blunt end cloning with Klenow, and transforming into SURE2 cells (Agilent). We call the “forward” orientation where the TG strand of the (TG)/(CA)-dinucleotide repeat stretches in the *Pitx1* enhancer region are on the G<sub>4</sub>T<sub>4</sub> strand of the telomere seed sequence and the noncoding strand of the URA3 gene in pVS20N. (TG)<sub>50</sub> oligos were annealed to (CA)<sub>50</sub> oligos, and then cloned into the pVS20N NsiI site (Klenow blunted) to produce pVS20N (TG)<sub>n</sub> and pVS20N (CA)<sub>n</sub> plasmids, where n was of varying lengths determined by Sanger sequencing (Sequetech BDX chemistry). The lengths of the repeats stayed stable in SURE2 cells over many generations. The plasmids for mammalian mutation assays were constructed by cloning TG and CA-repeats into the *supF* mutation-reporter shuttle vector pSP189 as previously described (19, 33) at the EcoRI-XhoI restriction sites to create pSP189-(TG)<sub>41</sub>, pSP189-(CA)<sub>41</sub>, pSP189-(TG)<sub>30</sub>, and pSP189-(CA)<sub>30</sub>.

#### Two-dimensional gel electrophoresis of topoisomers

Topoisomer distribution preparation and gel electrophoresis were performed as described previously (11) with the following parameters. We prepared different linking numbers by relaxation with calf thymus topoisomerase Ib (Invitrogen) in ethidium bromide concentrations of 0.75 ug/mL, 1.5 ug/mL, 2.25 ug/mL, 3 ug/mL, and 3.75 ug/mL. Each linking number preparation had a total volume of 40 uL and contained 2.7 ug pCR2.1 plasmid derivatives (containing stickleback test sequence, as described in “Plasmid construction” above). They were ethanol precipitated and resuspended in 20 uL of TE pH 8.0 (estimated final concentration ~100 ng/uL). 5 uL of each linking number preparation was mixed to create a 25 uL topoisomer distribution sample, which was heated at 60°C for ~45 min with cap open to reduce volume to ~8 uL. This sample was run on a 13x14 cm 1% agarose gel in a 1.5 mm diameter well in 1x TAE (without ethidium) at 45 V for ~17 h at room temperature. The gel was then washed in 1x TAE with 2 ug/mL chloroquine diphosphate for ~1 h, rotated 90°, and run again in 1x TAE with 2 ug/mL chloroquine diphosphate at 45 V for ~17 h at room temperature. Gels were stained with ethidium and imaged by UV light.

#### Yeast strains and yeast artificial chromosomes

A list of strains used and generated in this study is provided (table S3). All strains generated in this study were derivatives of the CFY1700 strain, which was generously provided by Catherine Freudenreich. The CFY1700 strain is in a S288c BY4741 background and contains YAC-VS5 (32) that has been allowed to break and heal at the T<sub>4</sub>G<sub>4</sub> telomeric seed site, so that it can be used to put a new test sequence on the yeast artificial chromosome. Our strains were generated by transforming NotI-linearized pVS20N, pVS20NR, or pVS20N+ori plasmid derivatives (containing stickleback or repeat test

sequence, as described in “Plasmid construction” above) into CFY1700. Transformants were selected on CSM-Ura plates, streaked twice for single colonies on CSM-Leu-Ura plates, and screened for correct integration by Southern blot and PCR.

#### Yeast artificial chromosome breakage assay

Yeast fragility assays were performed similarly to previous descriptions (14). Yeast artificial chromosome strains were grown to single colonies on CSM-Leu-Ura plates. A fluctuation analysis was done by inoculating 10 separate 1 mL liquid cultures of CSM-Leu (+Ura), which were grown at 30°C for 16-18 h to allow breakage to occur. Portions of each culture were plated on CSM (to count total number of cells) and on CSM+FOA-Leu (to count the number of FOA<sup>R</sup> cells). We verified that FOA<sup>R</sup> resulted from yeast artificial chromosome breakage and complete loss of *URA3* rather than from point mutations (fig. S11). The rate of yeast artificial chromosome breakage is approximated by the rate of FOA<sup>R</sup>, which was calculated using a modified method of the median (34); a single measurement replicate is the one median value derived from the 10 cultures. For each construct, 2 independent transformant lines were each tested 3 times, in total representing 6 replicates derived from 60 cultures. These median values are plotted in the box plots in Fig. 2, Fig. 3, and fig. S1, and are listed in table S4. Statistical significance calculated using a variety of methods (Wilcoxon Two Sample test for unpaired data, unpaired *t* test, and ANOVA with post-hoc Tukey’s Honestly Significant Difference) are listed in full in table S5.

#### Mammalian mutation assays and LM-PCR

Plasmid DNA (pSP189, pSP189-(TG)<sub>41</sub>, pSP189-(CA)<sub>41</sub>, pSP189-(TG)<sub>30</sub>, or pSP189-(CA)<sub>30</sub>) was transfected into COS-7 cells using GenePORTER according to manufacturer’s protocols (GenePORTER, Genlantis Inc., San Diego, CA). After 48 h, plasmids were recovered using a Qiagen Miniprep kit and digested with DpnI to remove unreplicated plasmids. Mutants were identified in MBM7070 bacterial cells by blue-white screening, as previously described (16). LM-PCR was carried out 48 h post transfection as previously described (19, 16). Briefly, the plasmids were recovered from COS-7 cells using Hirt’s method, and the isolated DNA was treated with PfuI Klenow Fragment in the presence of dNTPs to blunt the broken ends. After a linker was ligated to the breakpoints, PCR was used to amplify the regions between the specific upstream primer (located 183 bp upstream of the EcoRI site) and the linker. Amplified PCR products were separated by electrophoresis on 1.5% agarose gels.

#### Stickleback CRISPR oligos

DNA oligos used for stickleback CRISPR mutagenesis are listed below. Uppercase letters in target oligos denote sequence from *Pel*, and target oligo sequences were designed with CHOPCHOP (35). Scaffold sequence was previously described (36).

Target-Pitx1-129,561.F:

5′- aattaatacgcactcactataggAGCCTGATGTGCAGCACACCgttttagagctagaata

Target-Pitx1-129,601.R:

5′- aattaatacgcactcactatagGCACAGTGAAAGGATCCTCCgttttagagctagaatag

Target-Pitx1-130,342.R:

5′- aattaatacgcactcactatagGCTACCTGTTAGCGGCTAGCgttttagagctagaatag

Target-Pitx1-130,398.R:

5'- aattaatacagactcactataGGCGAGACAGAACCAGAACCgtttttagagctagaatagc

Scaffold:

5'- AAAAGCACCGACTCGGTGCCACTTTTTCAAGTTGATAACGGACTAGCCTTATTTTAACTTGCTA  
TTTTCTAGCTCTAAAAC

### Stickleback CRISPR knockout

Guide RNAs for CRISPR/Cas9-mediated mutagenesis were synthesized by *in vitro* transcription. DNA template was created by PCR-mediated extension of a target oligo and HPLC-purified scaffold oligo as follows: 25 uL total of 1 uM target oligo, 1 uM scaffold oligo in Phusion Master Mix (New England Biolabs M0531S), 10 sec 95 °C, 10 sec 60 °C, 10 sec 72 °C, cycled 40 times. PCR product was purified by gel extraction (Qiagen). Template guide DNAs were *in vitro* transcribed to produce guide RNA (gRNA) using the HiScribe T7 High Yield RNA Synthesis Kit (New England Biolabs E2040S) according to manufacturer's directions, treated with DNase, precipitated with LiCl, resuspended in water to 1 ug/uL, and aliquoted at -80°C. Targeted mosaic F<sub>0</sub> sticklebacks were generated by microinjection of freshly fertilized Rabbit Slough fish (6). Rabbit Slough is a natural pelvic complete marine population from Alaska that is homozygous for intact *Pel* alleles. The injection mix consisted of 6 uM Cas9-NLS protein (QB3 MacroLab, Berkeley, CA) and 300 ng/uL gRNAs (all four gRNAs transcribed from the target oligos above were pooled; concentration of each single gRNA was 75 ng/uL) in 10 mM Tris-HCl pH 8 with phenol red. Mosaic F<sub>0</sub> individuals were raised to adulthood and crossed to Paxton Lake Benthic fish (a natural population with homozygous *Pel* deletion) to produce *Pel*<sup>WT</sup>/*Pel*<sup>PAXB-Deletion</sup> and *Pel*<sup>CRISPR</sup>/*Pel*<sup>PAXB-Deletion</sup> F<sub>1</sub> progeny; crosses which did not produce any *Pel*<sup>CRISPR</sup>/*Pel*<sup>PAXB-Deletion</sup> progeny (no germline transmission) were discarded. All individuals phenotyped in fig. S5 are siblings from the same cross. *Pel* genotype was determined using nested PCR, with Pitx1-128,592.F and Pitx1-132,268.R as outer primers, and Pitx1-129,112.F and Pitx1-130,662.R as inner primers, and reaction conditions as described for "Plasmid construction" above. Additional mosaic F<sub>0</sub> individuals were crossed to Rabbit Slough or Matadero Creek fish, and *Pel*<sup>CRISPR</sup>/*Pel*<sup>WT</sup> F<sub>1</sub> progeny DNA was amplified by PCR (nested PCR with Pitx1-128,592.F and Pitx1-132,268.R as outer primers, and Pitx1-129,065.F and Pitx1-131,758.R as inner primers) and sequenced to observe *Pel* CRISPR-induced mutations.

### Skeletal preparation

Fish were fixed in 10% neutral buffered formalin for at least 1 week, placed in distilled water (dH<sub>2</sub>O) for 24 hours, and then placed in 70% ethanol for at least 1 day. Fish were slowly rehydrated to water in a series of at least 1 hour washes (50% ethanol, 25% ethanol, dH<sub>2</sub>O). Fish were washed twice in 30% saturated sodium borate for 5 minutes and then cleared in trypsin solution (0.25% trypsin in 30% sodium borate) until translucent. Fish were then washed in 2% KOH twice for 5 minutes, and then stained in Alizarin Red solution (0.002% Alizarin Red S powder in 2% KOH) for 24 hours. Fish were bleached in H<sub>2</sub>O<sub>2</sub> solution (0.375% KOH, 25% glycerol, and 0.0015% H<sub>2</sub>O<sub>2</sub>) until pigment was gone. Fish were transferred to 100% glycerol through a series of 0.5% KOH:glycerol solutions (3:1, 1:1, 1:3) and finally stored in 100% glycerol with thymol.

### Replication timing materials and library preparation

In brief: Developing stickleback embryos were dissociated and sorted for S-phase and G0/G1-phase cell populations. DNA was extracted from each population and sequenced. In a mixed S-phase population, regions that replicate earlier are at higher copy number (up to 2x) than regions that replicate later. The read depth in S-phase, normalized to the read depth in G-phase, thus represents replication timing. Peaks represent presumptive replication origins or clusters of origins. Steep slopes indicate primarily unidirectional replication. In detail: Stickleback clutches of ~50-100 embryos from 9 different populations (BDGB, RABS, JADE, BOOT, BEPA, KFSY, LSHP, ORPH, BOUL) of wild-caught fish were grown for ~10 days at 16°C until they reached Swarup developmental stages 24-26 (37). Each clutch was then dissociated into single cells using the Worthington Papain Dissociation System according to the manufacturer's instructions with ~40 minutes incubation in papain solution. Single cells were resuspended in 3 mL cold PBS with 1% FBS, and 7 mL of cold 100% ethanol was added slowly while swirling to fix the cells. Fixed cells were stored at -20°C. Ethanol fixed cells were spun down and resuspended in 50 ug/mL propidium iodide, 250 ug/mL RNaseA, in PBS with 1% FBS to stain for DNA content. Cells were filtered through a 70 um nylon cell strainer before sorting on a BD FACS Aria by propidium iodide. Although traditional replication timing strategies collect an early S-phase and a late S-phase population (38), we collected just one mid S-phase population, due to the limiting number of cells undergoing DNA replication in developing embryos. Sorting continued until ~2,000,000 G0/G1-phase cells and ~250,000 S-phase cells were collected. Another 200 ug of glycogen was added to the collected cells along with ~3-5 volumes of 100% ethanol, and then cells were precipitated by centrifugation at 300 g for 5 min. The pellet was resuspended in 600 uL of 10 mM Tris pH 8.0, 100 mM NaCl, 10 mM EDTA, 0.5% SDS, and 333 ng/uL Proteinase K, and incubated overnight at 55°C. Genomic DNA was isolated by phenol:chloroform extraction with 1-2 chloroform washes and ethanol precipitation. Sequencing libraries were prepared using the Nextera DNA Library Preparation Kit (Illumina) according to the manufacturer's instructions, except that we increased Tagmentation time to 10 minutes from 5 minutes, and we used 50 uL of AMPure XP beads instead of 30 uL for PCR cleanup. G0/G1-phase DNA and S-phase DNA were separately barcoded during library preparation and sequenced together in one lane (per population) on the Illumina HiSeq 2000 platform with single-end 101 bp runs.

### Replication timing analysis

Reads were adapter trimmed and aligned to the reference stickleback genome (version gasAcu1) using Burrows-Wheeler Aligner's Smith-Waterman Alignment (39). Read depth was extracted for each base in the genome, and bases mapping more than 3 standard deviations over the mean read depth were discarded from subsequent analysis. Each individual G0/G1-phase and S-phase library read depth was normalized to its own mean depth, then all 9 populations' G0/G1-phase normalized depths were combined into a single G0/G1-phase dataset, and all 9 populations' S-phase normalized depths were combined into a single S-phase dataset. The S/G depth ratio was calculated using the combined normalized read depth from these datasets over a 50 kb sliding window with 25 kb step. Slopes were calculated using 5 windows upstream and 5 windows downstream. Raw sequencing data and processed S/G read depth ratio data have been deposited at the Gene Expression Omnibus, accession GSE121537.

### TG-repeat identification

TG-repeats in the genome were identified using Basic Local Alignment Search Tool (BLAST version 2.2.31). A (TG)<sub>100</sub> sequence (i.e. 200 nucleotides of “TGTGTGTG...”) were aligned by BLAST against the stickleback (version gasAcu1) or human (version hg19) reference genomes using default settings without repeat masking. Since the query sequence is repetitive, raw BLAST results will return multiple matches for a single stretch of genomic repeats (e.g. a single (TG)<sub>33</sub> repeat at chrI:28680-28745 will match query positions 1-66, 2-67, 3-68, etc., and also query positions 1-60 will match chrI:28680-28739, chrI:28681-28740, chI:28682-28741, etc.). Thus, results with overlapping chromosome positions were collapsed into a single entry. Because overlapping results were collapsed, repeat stretches both shorter or longer than (TG)<sub>100</sub> were identified, and the distribution in identified repeat lengths did not change if (TG)<sub>50</sub> or (TG)<sub>200</sub> query sequences were used instead of a (TG)<sub>100</sub> query sequence.

### Human double-strand break analysis

Human aphidicolin sensitive double-strand break sites (40) and human replication timing data (41) were obtained from previous studies and from ENCODE (GEO GSM923449). The top 5,000 aphidicolin sensitive 48-kb genomic windows were used in the enrichment analysis. Replication direction slope for each TG-repeat was calculated using 5 replication timing windows upstream and 5 windows downstream of the location of the TG-repeat. TG-repeats were then split into 3 quantiles for replication direction slope and 3 quantiles for TG-repeat length. Each of these 9 groups contained ~5,000 TG-repeat stretches. Enrichment and statistical significance were calculated as described previously (42). Briefly, the null overlap distribution was calculated by holding the locations of TG-repeats in each class constant (~5,000 locations) and reassigning the aphidicolin sensitive windows (5,000 locations) to every possible location in the genome. Enrichment was calculated by dividing the real number of overlaps between TG-repeats and aphidicolin sensitive windows by the average number of overlaps in the null distribution. P values represent the probability of the real number of overlaps or more occurring by chance in the null distribution. Similar results are obtained if the null distribution is calculated by holding the locations of aphidicolin sensitive windows constant and reassigning the locations of TG-repeats.

### Population genetics modeling

The number of potential de novo mutations at a specific locus in the genome was calculated for a range of possible mutation rates ( $\mu$ ) and stickleback census population sizes ( $N$ ). The modeled mutation rates ( $10^{-9}$ - $10^{-2}$ ) span spontaneous mutation rates for a range of mechanisms (43, 44). The modeled population sizes ( $10^2$ - $10^9$ ) generously cover estimates for a range of stickleback freshwater habitats ( $10^3$ - $10^6$ ), from small ponds to large lakes (45). The total number of generations ( $G$ ) was set to  $10^4$ , as expected for post-glacial populations breeding once every one to two years (45, 46). The total number of potential mutations arising at a particular locus ( $\Theta$ ) was calculated by multiplying the population mutation rate ( $\theta = 2N\mu$ ) by the number of generations, as follows:

$$(Equation 1.) \quad \Theta = 2N\mu G$$

The probability that any given mutation will eventually fix at any time in the future ( $\pi$ ) was calculated using Kimura's general diffusion equation (21) with additivity (dominance coefficient  $h = 0.5$ ), since *PeI* mutations are semidominant based on previously published empirical results (47):

$$(Equation 2.) \quad \pi = (1 - e^{-sN_e/N}) / (1 - e^{-2sN_e})$$

where  $N_e$  is the effective population size, and  $s$  is the selection coefficient (relative fitness of the homozygote). Effective population sizes are typically 10% or less of census population sizes (48), and have been previously estimated as 3-6% in some stickleback populations (49, 50). A conservative estimate of  $N_e/N = 0.1$  was used for Fig. 4D and fig. S7. Results using a wide range of  $N_e/N$  (from 0.01 to 1) are shown in fig. S6, with the general result that successful adaptation probability being highly dependent on mutation rate holding true even at the extreme case of  $N_e = N$ , albeit less so at the largest population sizes and highest selection coefficients. Positive selection on a new pelvic reduction allele was modeled in the range of  $s = 0.1$  to  $s = 0.001$ . Previous studies have measured strong selection on some stickleback armor traits, including  $s \geq 0.1$  for the *Eda* major plates locus (51). For comparison, pelvic reduction requires  $\sim 2,000$  generations to appear and reach high frequency in the fossil record (52), corresponding to time-averaged  $s$  on the order of  $\sim 0.01$  or less. The neutral scenario (genetic drift) was modeled with  $\pi = 1/2N$  (which is also the limit of  $\pi$  as  $s$  approaches 0 in Equation 2).

The probability that at least one mutant allele will arise within  $G$  generations that will successfully fix in the future, as shown in Fig. 4D, fig. S6, and fig. S7A, is:

$$(Equation 3.) \quad 1 - (1 - \pi)^{\Theta}$$

However, for neutral and small  $s$ , the average time to fixation for an eventually successful allele will exceed the total number of generations under consideration (53) (fig. S7B). We therefore integrated the known probability density function of times to fixation for a neutral allele (54), to calculate the cumulative distribution function of times to fixation for a neutral allele. The probability that a neutral allele destined for fixation will fix in  $t \leq G$  generations is then:

$$(Equation 4.) \quad Y(G) = \int_{t=0}^G \sum_{i=1}^{\infty} (2i+1)(-1)^{i+1} \lambda_i e^{-\lambda_i t} dt$$

where  $\lambda_i = i(i+1)/4N_e$ . Although the distribution of times to fixation is classically described for neutral alleles (54), it is not for selectively advantageous alleles ( $s > 0$ ). However, for the  $G = 10,000$  generations considered here, the average time to fixation for  $s = 0$  and  $s = 0.001$  is similar (fig. S7B). We therefore also used Equation 4 for the  $s = 0.001$  condition. For larger  $s$  ( $s = 0.01$  and  $s = 0.1$ ), the average time to fixation is small enough compared to  $G = 10,000$  generations (fig. S7B) that we did not model this additional constraint.

The adjusted probability that at least one mutant allele will arise within  $G$  generations and also have time to fix within  $G$  generations, as shown in fig. S7C, is therefore:

$$(Equation 5.) \quad 1 - (1 - \pi Y(G))^{\Theta}$$



This calculation does not account for the reality that, e.g., a mutant arising at generation 6,000 will only have 4,000 generations left (and not the full 10,000 generations) until 10,000 generations have passed from the initial colonization. The final probabilities are therefore a slight overestimate but do not alter the interpretation of the results.

#### Mutational mechanisms in human evolution

To examine mutational mechanisms contributing to likely adaptive traits in humans, we focused on a time frame of migration of modern humans out of Africa to new regions around the world (occurring over roughly 60,000 years or 3,000 generations, with estimated effective population size of  $10^4$ , conditions similar to evolutionary parameters in sticklebacks (24, 55)). We identified 94 examples of human traits likely to be adaptive and having a known molecular basis (table S1), based on an updated review of previously known loci of evolution (56). We further classified molecular changes based on whether they affect protein coding or non-coding regions, and whether they had likely arisen by low mutation rate mechanisms (small indels and single nucleotide changes at non-CpG sites) or high mutation rate mechanisms (homopolymer slippage, large indels, and C to T single nucleotide changes at CpG sites, which are known to occur at rates ~10-18 times higher than that of other substitutions (43, 44)).

Figure S1

A

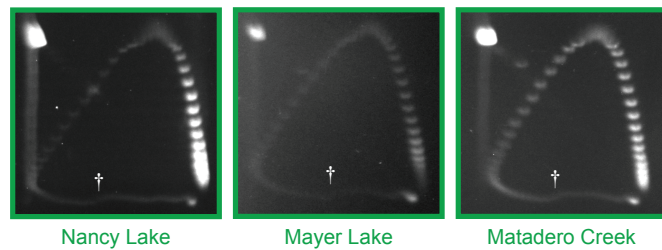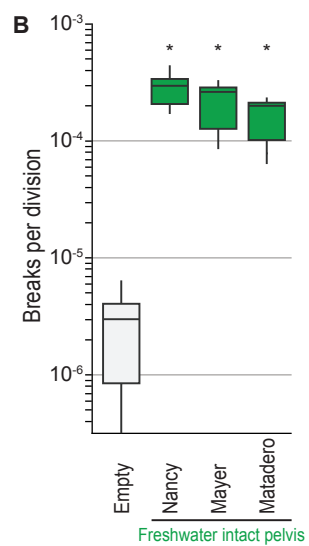

**Figure S1. *Pel* DNA sequences from freshwater pelvic-complete fish retain alternative structure and high breakage rates.**

(A) *Pel* sequences from three different freshwater populations without pelvic reduction. Dagers, mobility shifts. (B) Yeast artificial chromosome breakage rates from the same populations, plotted as in Fig. 2. \* $p < 0.01$  (table S5). Although pelvic reduction is only seen in freshwater stickleback populations, not all freshwater populations have pelvic reduction. Environmental conditions that favor pelvic reduction are rare (5, 57). Low mutation rates may preclude the fixation of a trait when it is selectively advantageous (Fig. 4D, fig. S6), but high mutation rates alone do not dictate the path of evolution when a trait is disadvantageous. That elevated mutation rates are important in stickleback evolution is therefore compatible with and does not contradict classic descriptions of mutation-selection balance or the idea that environmental conditions also play a key role in evolutionary outcomes.

Figure S2

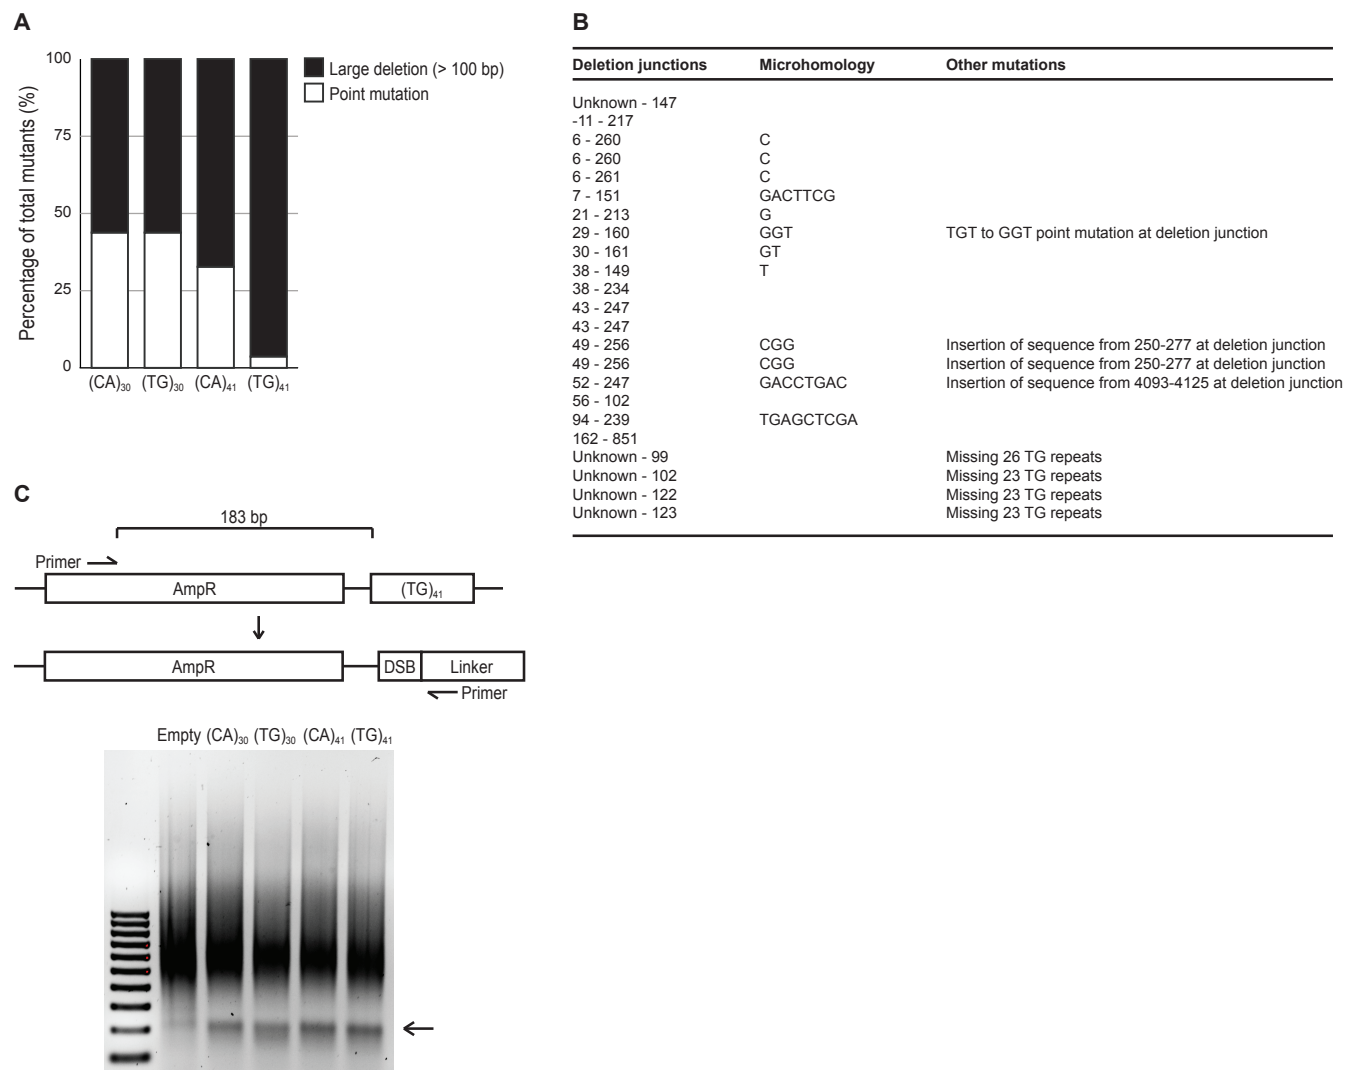

**Figure S2. TG-repeat-induced mutations and double-strand breaks in mammalian cells.**

(A) Mutation spectrum of sequenced mutants. This assay is sensitive to most types of mutations, including point mutations and deletions. Nearly all of the mutations induced by (TG)<sub>41</sub> are >100 bp deletions. (B) Detailed table of all sequenced (TG)<sub>41</sub>-induced deletions in mammalian cells, a subset of which (the clean deletions) are shown in Fig. 3F. Unknown indicates junctions that extended near the primed region. Repeated rows indicate same deletion recovered multiple times. Coordinates are defined such that the (TG)<sub>41</sub> repeat is from positions 7-88. (C) The junctions of the deletions suggested that the mutagenic events might occur during repair of breaks induced by the repeat sequences. We further mapped the breaks using ligation-mediated PCR (LM-PCR) on plasmids recovered from mammalian cells 48 hours after transfection. Schematic shows the location of the upstream PCR primer (located in the mutation shuttle vector) and a downstream PCR primer (located in a linker sequence that is added by ligation at the position of breaks). Amplified products were separated on a 1.5% agarose gel. All 4 repeats lead to the production of PCR products of ~210 bp, suggesting the formation of breaks ~190-bp downstream of the specific primer, which is near the dinucleotide repeat sequences.

**Figure S3**

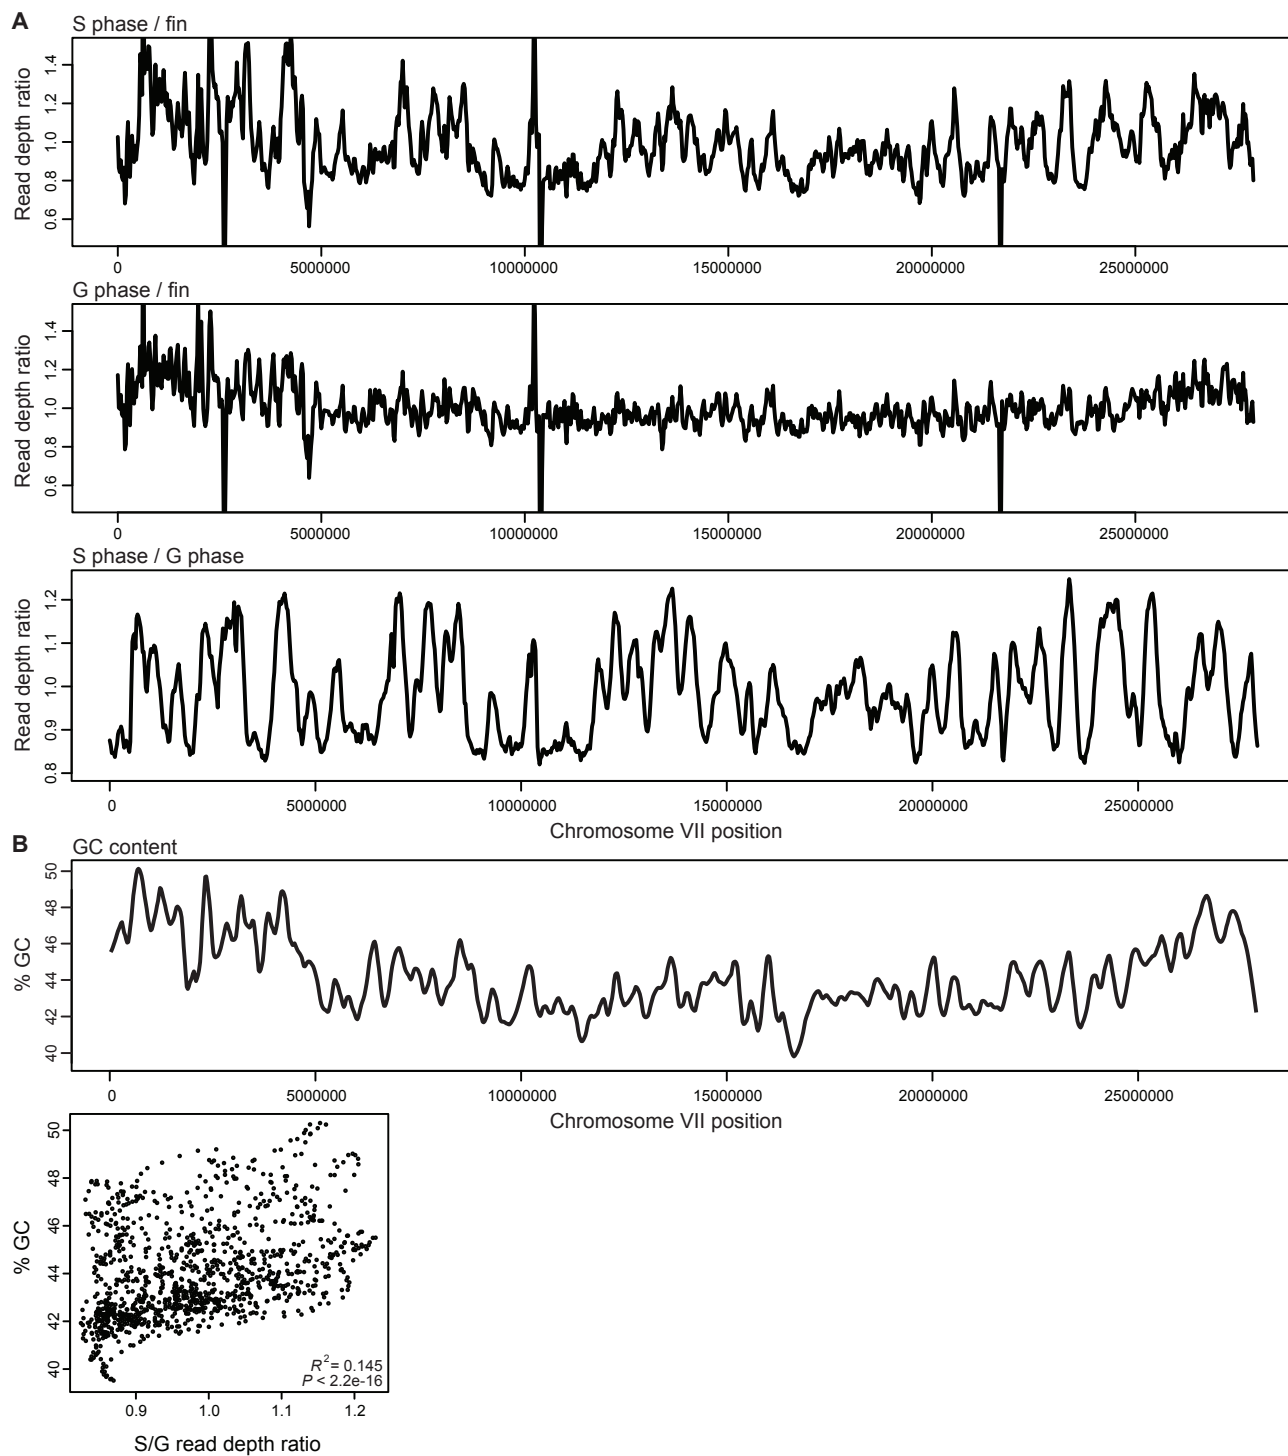

**Figure S3. Stickleback replication timing profile validation.**

**(A)** Replication timing signal is driven by S-phase read depth, as theoretically expected (Fig. 4A). Chromosome VII S-phase read depth (top panel) or G-phase read depth (middle panel) was normalized to adult non-dividing fin tissue read depth. The full chromosome VII S/G profile from Fig. 4 is provided (bottom panel) for reference. The S/fin profile is similar to that of S/G, whereas the G/fin profile is noisy. **(B)** Top panel, GC content profile along chromosome VII. Bottom panel, chromosome VII S/G read depth ratio vs. GC content. Earlier replicating regions (higher S/G ratio) tend to have higher GC content, as reported previously (58).

Figure S4

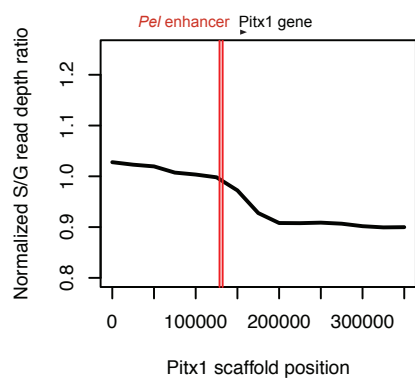



**Figure S4. Close up of the end of chromosome VII containing the *Pel* locus.**

Scaffold position 0 starts immediately after assembly gap shown in Fig. 4B. Red lines denote beginning and end of *Pel* region tested in Fig. 1, Fig. 2, and diagrammed in Fig. 3A. Black arrowhead denotes position of *Pitx1* gene, which transcribes to the right. The position of the *Pel* sequence to the right of a replication timing peak indicates that the TG repeat-rich strand of the *Pel* enhancer would serve as the template for lagging strand DNA synthesis, which is the fragile orientation based on fragility assays (Fig. 2, Fig. 4C).



**Figure S5. CRISPR/Cas9 targeting of *Pel* sequence causes deletions and pelvic reduction in stickleback crosses.**

(A) Diagram of cross strategy for detecting deletions and pelvic phenotypes. Fertilized eggs from the RABS marine population (wild type at *Pel*) were injected with Cas9 and guide RNAs flanking the *Pel* enhancer region. Mosaic F<sub>0</sub> founders were crossed to RABS to transmit deletion alleles and characterize typical lesion breakpoints (deletion alleles are smaller than wild type alleles and easier to amplify in the presence of the RABS allele). An additional F<sub>0</sub> founder was crossed to the PAXB freshwater population to test for pelvic reduction phenotypes (PAXB fish carry a natural deletion of *Pel*, making it possible to score recessive pelvic phenotypes in F<sub>1</sub> hybrids without additional generations of breeding). (B) To-scale map of CRISPR/Cas9-induced deletions transmitted to F<sub>1</sub> hybrids in crosses with RABS. Green box, *Pel* sequence previously shown to drive pelvic expression (6). Light brown shading, location of TG-repeat sequences. Arrows, location of guide RNAs flanking *Pel* region. White boxes, DNA deletions. Blue lines, DNA remaining. Letters indicate microhomologies present at deletion junctions. (C) Genotypes and phenotypes in cross with PAXB. All individuals in table are siblings from the same cross. Fish that inherit a PAXB allele and a transmitted wildtype allele all develop a full pelvis. In contrast, fish that inherit a PAXB allele and a transmitted CRISPR-deletion allele show various forms of pelvic reduction. Typical structures of a fully developed stickleback pelvis are labeled in line diagrams in left and ventral views. AB, ascending branch; AP, anterior process; PP, posterior process; PS, pelvic spine. Alizarin Red stained skeletal structures are shown for a representative *Pel*<sup>WT</sup>/*Pel*<sup>PAXB</sup> animal with a complete pelvis and all seven *Pel*<sup>CRISPR</sup>/*Pel*<sup>PAXB</sup> animals with various forms of pelvic reduction. Panel views are L, left; R, right; and V, ventral for each individual.

Figure S6

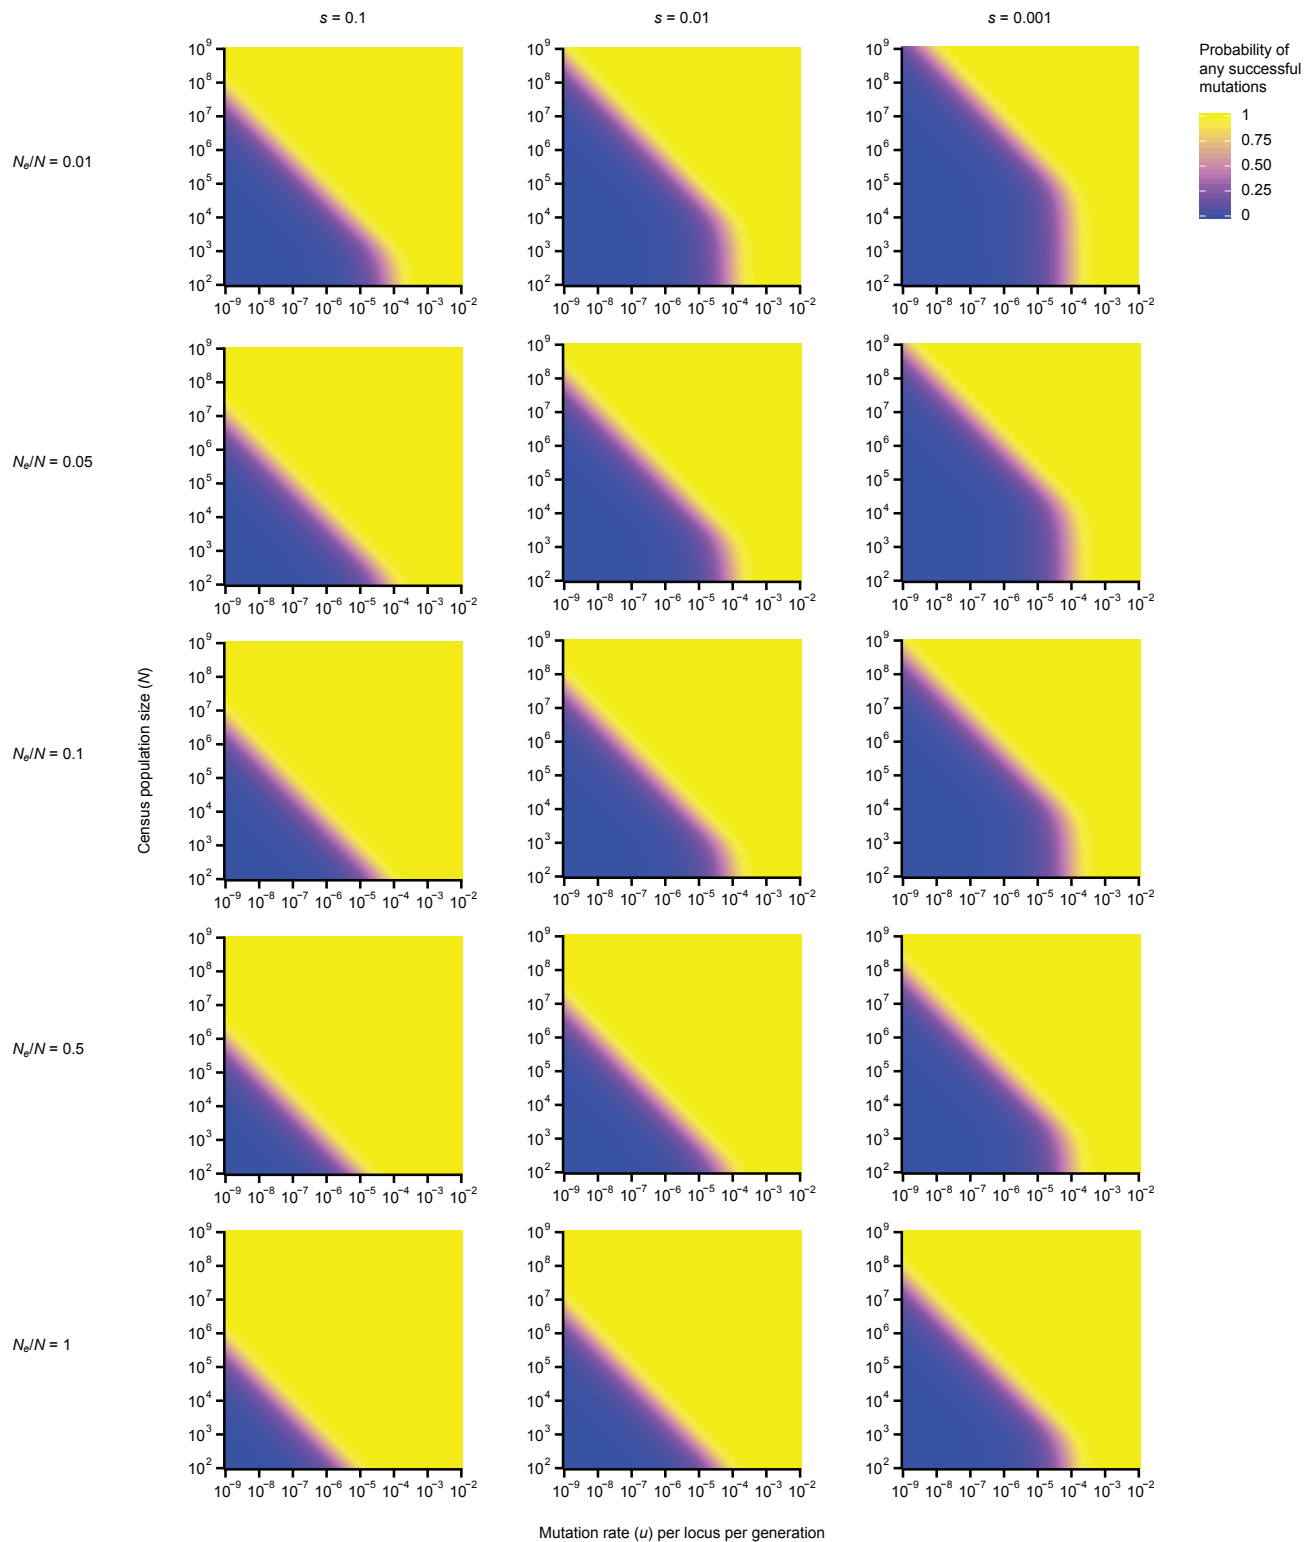

**Figure S6. Modeling results over a wider range of parameters.**

The probability of at least one mutation arising at a particular locus within 10,000 generations and successfully fixing at any time in the future was calculated as in Fig. 4D (also see Methods Equation 3). Results shown here are across a wider range of selection coefficients ( $s$ ), population sizes ( $N$ ), and effective population size ratios ( $N_e/N$ ) than shown in Fig. 4D.

Figure S7

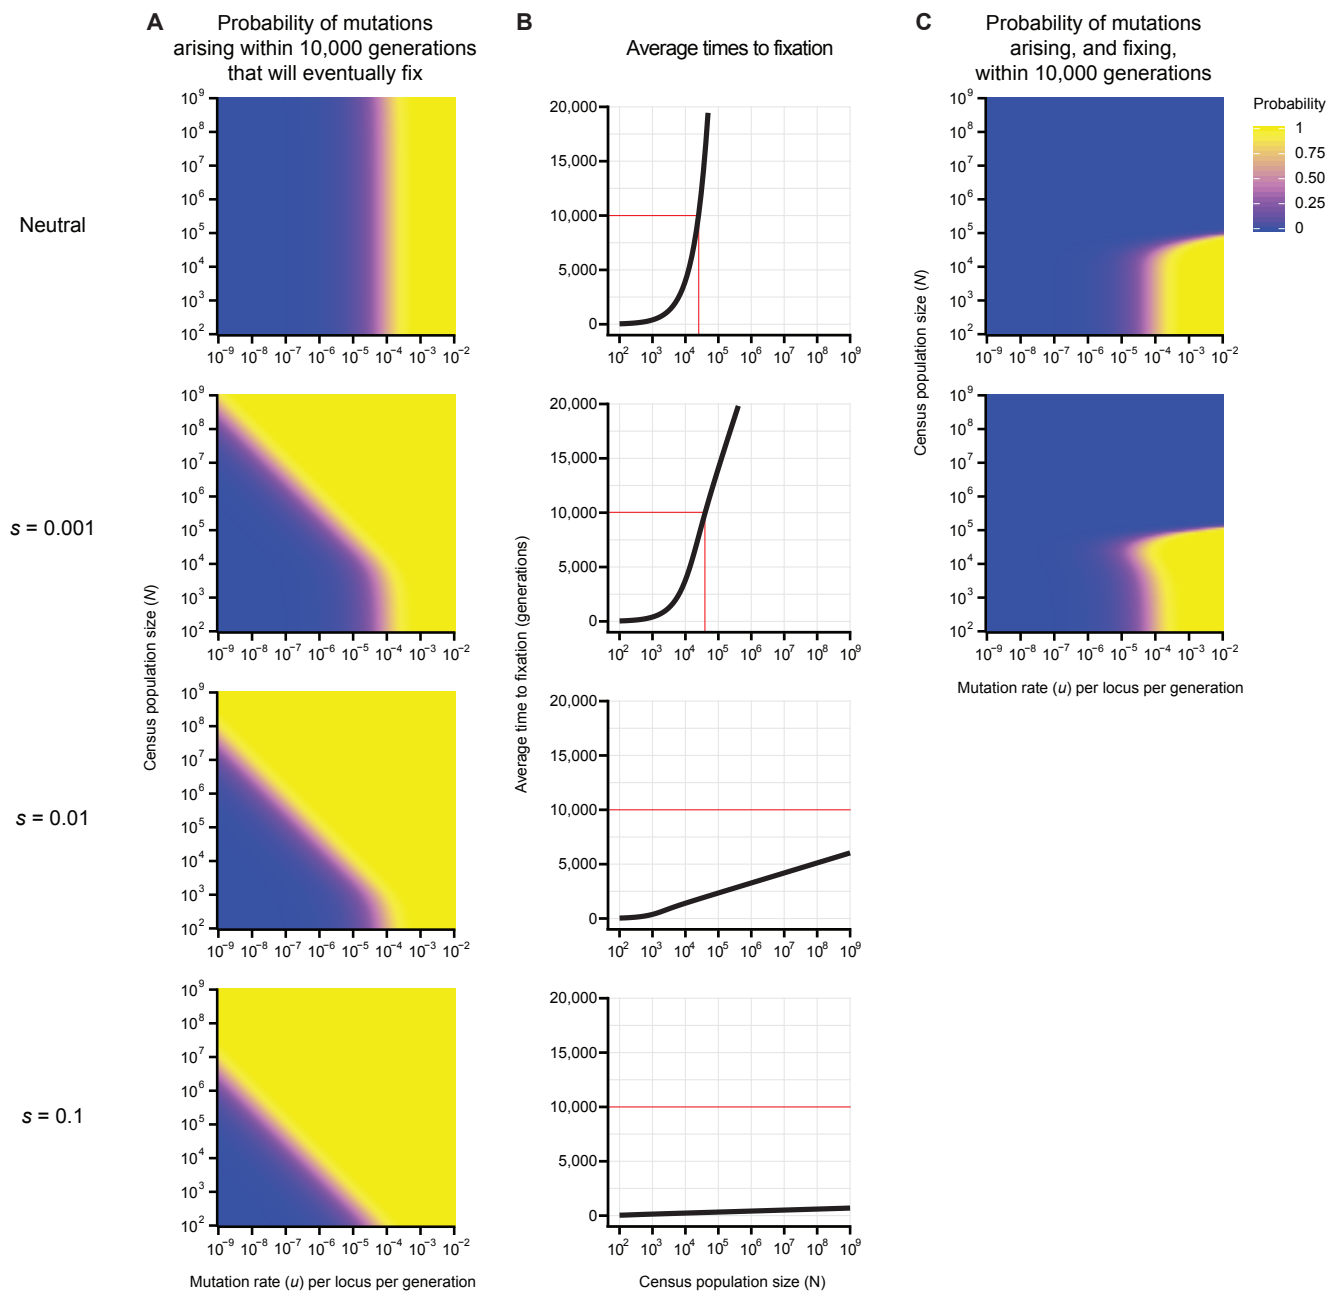

**Figure S7. Probability of successful de novo mutation depends on mutation rate.**

(A) The occurrence and fixation of different types of spontaneous mutations was modeled in freshwater sticklebacks using  $G=10,000$ ,  $N_e/N=0.1$ , and a range of mutation rates, population sizes, and selection coefficients (also see Methods Equation 3). (B) The average time to fixation for an eventually successful allele will exceed 10,000 generations for neutral and small  $s$ , when the population size begins to exceed  $\sim 10^4$ - $10^5$ . (C) The adjusted probability that at least one mutant allele will arise within  $G=10,000$  generations and also have time to fix within  $G=10,000$  generations (also see Methods Equation 5). Because mutations occurring at the highest fragile site frequencies can fix under both neutral and adaptive scenarios, these results do not provide new information about whether pelvic reduction is adaptive in sticklebacks. However, an adaptive model is supported by several other types of independent ecological and molecular data, including: association of pelvic-reduction with particular ecological conditions in between-lake comparisons (5); consistent association of the trait with particular environments within lakes, maintained even in the face of gene flow (4, 59); consistent molecular signatures of positive selection surrounding *Pel* deletions in multiple pelvic-reduced populations (6); and trait variation that exceeds molecular signatures of neutral drift within populations (7). Thus, repeated use of *Pitx1* for pelvic evolution in sticklebacks most likely reflects a combination of both elevated mutation rates making de novo variants available, and ecological conditions providing a selective advantage for pelvic-reduction alleles in particular environments.

Figure S8

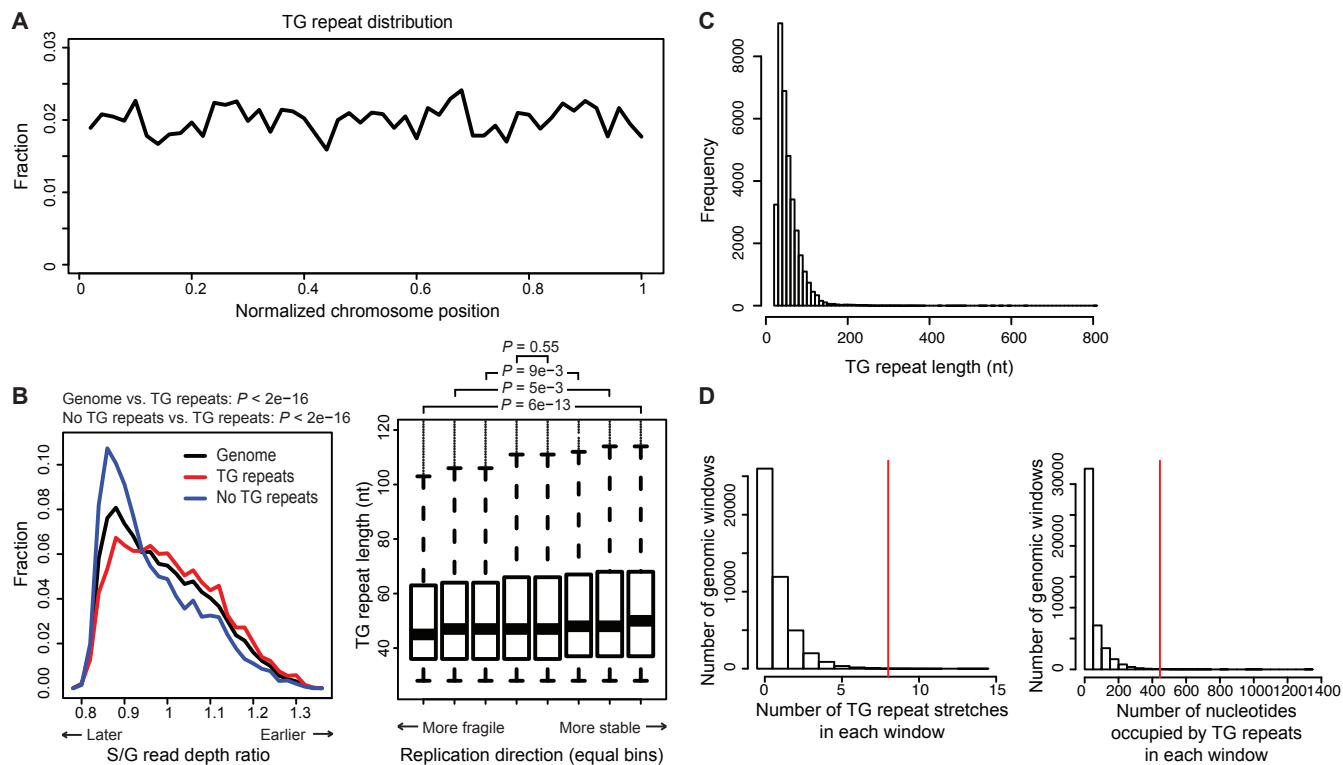



**Figure S8. TG-repeats in the stickleback genome.**

(A) Distribution of the ~34,000 TG-repeat stretches identified in the stickleback genome along a meta-chromosome, consisting of every chromosome normalized to length 1. (B) Left panel, distribution of S/G read depth ratios in 50 kb windows, for either: all windows, only windows that contain TG-repeats, or only windows that do not contain TG-repeats. Regions with TG-repeats are depleted in later replicating parts of the genome. Right panel, distribution of lengths for TG-repeats separated into 8 equal bins. Bins are ordered by replication timing slope, from primarily unidirectional replication in the fragile orientation (most negative slope) to neutral (slope near 0) to primarily unidirectional in the stable orientation (most positive slope). TG-repeats are significantly shorter in genomic regions where they are predicted to be in the fragile replication orientation. P values for both panels were calculated using Wilcoxon Two Sample Test. These small but significant biases could result from either neutral sequence evolution (fragile TG-repeats create DNA breaks, which delete or shorten the repeat) or purifying selection (fragile TG-repeats near essential genes would be disadvantageous) and suggest that TG-repeat-induced fragility has shaped the stickleback genomic landscape. (C) Distribution of TG-repeat lengths in the stickleback genome. (D) Distribution of the number of TG-repeat stretches and number of total nucleotides occupied by TG-repeats in 10 kb windows. Red line indicates the genomic window containing the *Pel* locus, which contains 4 TG-repeat stretches in the ~3 kb window tested in Fig. 1, Fig. 2, and fig. S1, plus 4 additional stretches in the rest of the 10 kb window. Although the *Pel* region is an outlier in its number of TG-repeats, the breakage assay results show that a single TG-repeat stretch is enough to confer fragility (Fig. 3). Thus, many other locations in the genome harboring TG-repeats in the fragile orientation may also represent sites with elevated mutation rates.

**Figure S9**

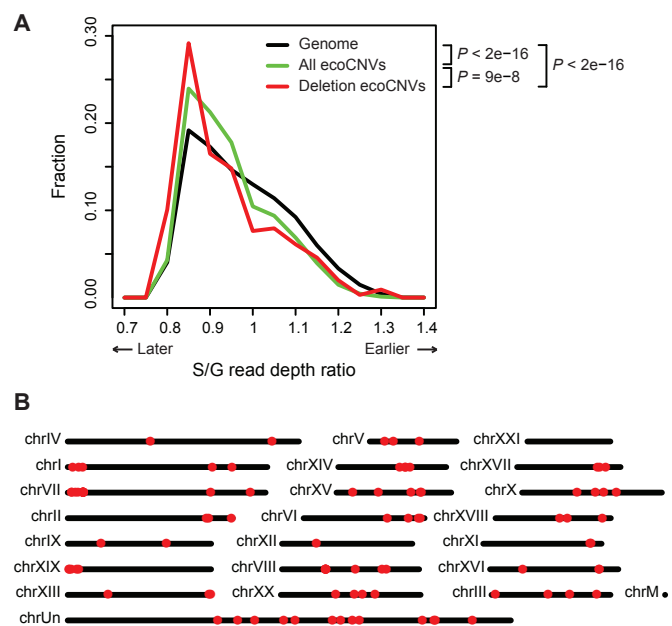

**Figure S9. Ecotypic copy number variation in the stickleback genome.**

(A) Distribution of S/G read depth ratios for either: the whole genome, the previously identified ~6,500 recurrent sites of copy number variation (CNV) that are consistently different between marine and freshwater ecotypes (ecoCNVs) (31), or only ecoCNVs that are deletions. P values were calculated using Wilcoxon Two Sample Test. These ecology/habitat-associated CNVs, especially deletions, were significantly enriched in late replicating regions of the stickleback genome, a trend also noted in humans (41). (B) Of 659 regions present in marine populations but recurrently deleted in freshwater populations, 98 (14.9%) were near ( $\leq 1$  kb) a TG-repeat (table S1). Genomic locations of these 98 deletions are shown.

**Figure S10**

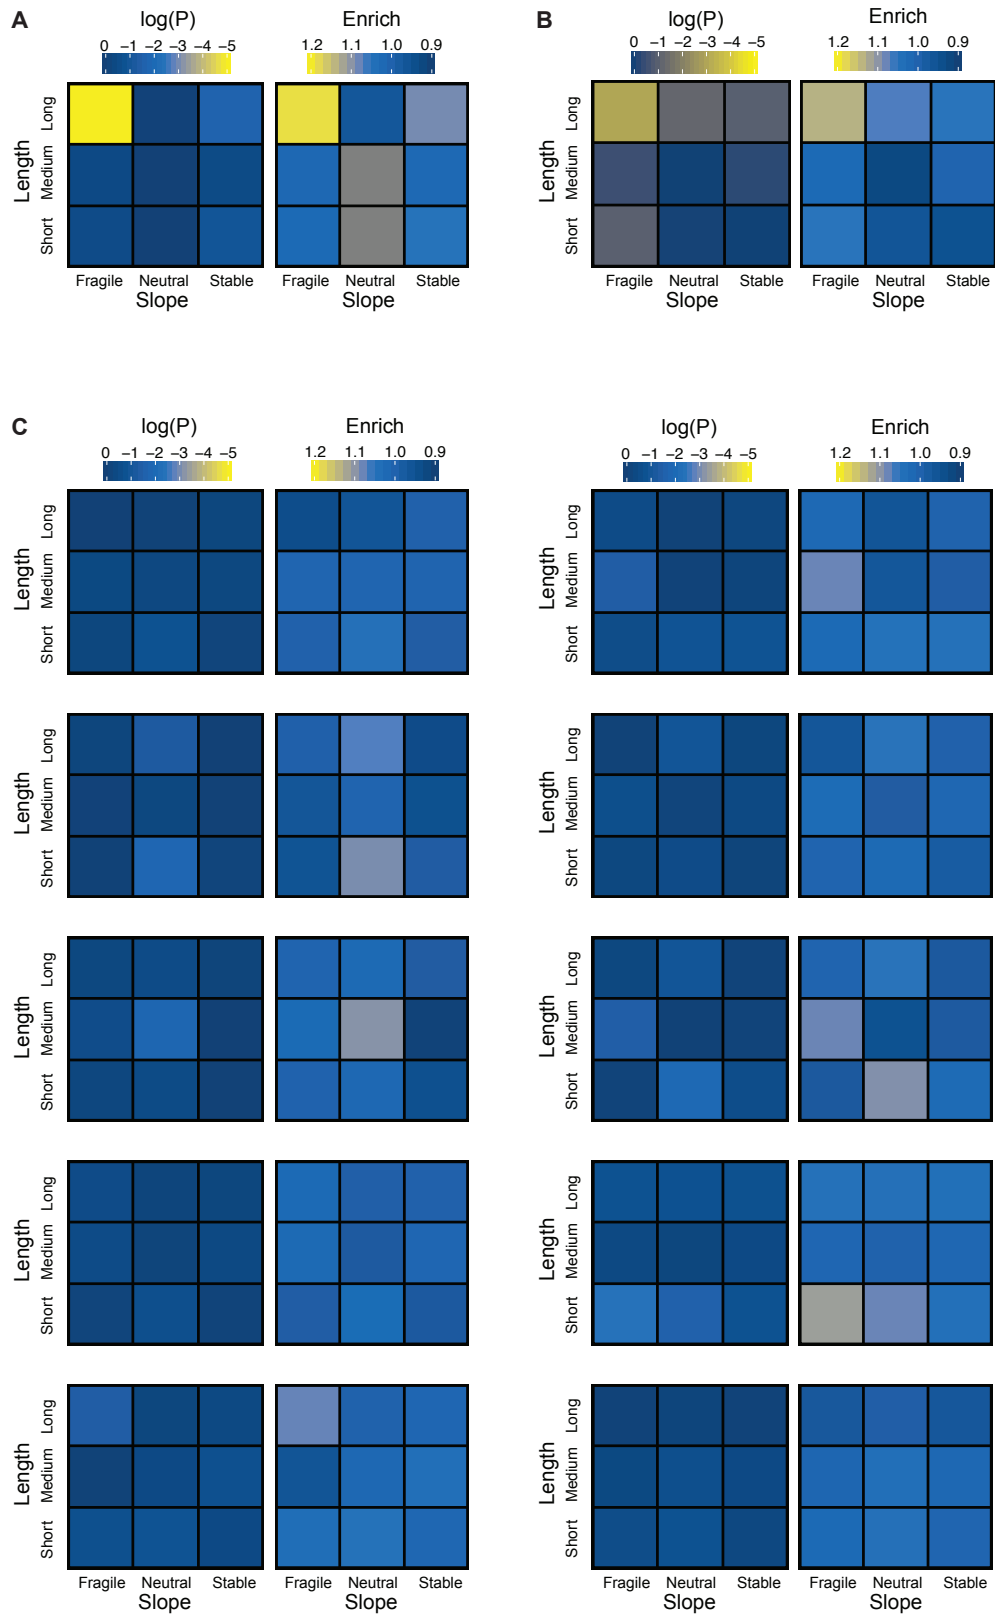

**Figure S10. Association of human aphidicolin-sensitive DNA double-strand break sites with classes of TG-repeats.**

(A) Replication timing data (41) was used to determine the direction of replication through ~45,000 human TG-repeats. y-axis, TG-repeats length quantiles. x-axis, replication timing slope quantiles. Left panel, p values. Right panel, enrichment near DNA breaks of long TG-repeats in the fragile orientation. Long TG-repeats in the fragile orientation are slightly but significantly enriched around sites of DNA breakage reported in human cells following exposure to the DNA replication inhibitor aphidicolin. The enrichment is small because TG-repeats are not the only mechanism creating DNA breaks. No enrichment was observed with short repeats or with repeats in stable orientations. TG-repeats may thus also contribute to DNA breakage sites in humans. (B) The same analysis as in (A), except using a replication timing dataset from HeLa-S3 cells (GEO GSM923449). HeLa-S3 cells are diverged from HeLa cells in both morphology (suspension instead of adherent) and genotype (both cell lines have unstable karyotypes). The association between long TG-repeats in the fragile orientation and DNA breaks is still significant but less so with HeLa-S3 data, and the p value color scale is adjusted to better visualize the distinction. (C) The same analysis as in (A) repeated 10 times, except each time using 5,000 random genomic sites instead of the top 5,000 aphidicolin-sensitive genomic sites. Random genomic windows do not show any significant enrichment with any TG-repeat types.

**Figure S11**

**A**

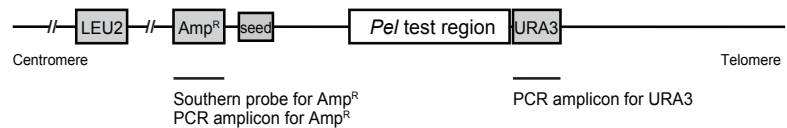

**B**

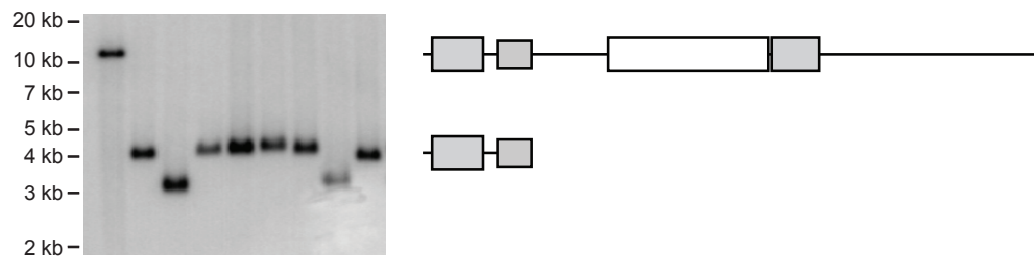

**C**

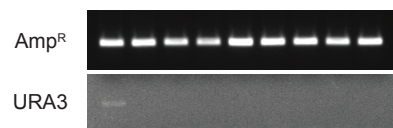

**Figure S11. Yeast artificial chromosome breakage assay detects chromosome breakage.**

(A) To-scale diagram of a full length yeast artificial chromosome. Hash marks, gaps. *LEU2* and *URA3*, marker genes. Seed, telomere seed site. Amp<sup>R</sup>, ampicillin resistance gene. EcoRI cuts between *LEU2* and Amp<sup>R</sup>. Distance from EcoRI cut to end of telomere is ~12 kb. (B) Southern blot, hybridized with an Amp<sup>R</sup> probe, of EcoRI-digested genomic DNA from a full length yeast artificial chromosome strain (leftmost lane) and 8 independent FOA<sup>R</sup> leu<sup>+</sup> colonies post-breakage (other lanes). Diagrams on right depict models of blotted DNA fragments at their respective fragment sizes (left-most gray box is Amp<sup>R</sup>). (C) PCR of Amp<sup>R</sup> and *URA3* amplicons using the same DNA as in (B).

**Table S1.**

Mutations underlying adaptive changes in recent human evolution. An extensive literature review identifies multiple loci thought to have contributed to adaptive evolution during the time frame of recent migration and expansion of human populations out of Africa (56). Although most currently known examples are limited to coding region changes (56), we note that half of the changes (47/94) likely arose by elevated mutation rate mechanisms, including 38 C to T mutations at CpG sites, plus 9 homopolymer slippage or large deletions/duplications. The high frequency of CpG transitions among the human mutations (47.6% (34/71) of single nucleotide changes occurring in coding regions) represents a ~17-fold enrichment over the ~2.8% frequency of CpG sites in human coding sequence (60). DNA fragility at the *Pel* region and our population genetics modeling suggest that many currently unidentified regulatory mutations underlying other adaptive traits in humans (61) and sticklebacks (31) may also arise by high mutation rate mechanisms, a possibility that can be further tested as additional causative regulatory changes are found.



Table S1

| Trait                              | Gene     | Amino acid change       | Nucleotide change             | Mutation type | Variant ID  | References (PubMed ID)                                     |
|------------------------------------|----------|-------------------------|-------------------------------|---------------|-------------|------------------------------------------------------------|
| Alcohol response                   | ADH1B    | R48H                    | C->T                          | CpG           | rs1229884   | 17847010, 18382665, 20089146, 23071458                     |
| Alcohol response                   | ADH1B    | R370C                   | C->T                          | CpG           | rs2066702   | 17847010, 18382665, 20089146, 23071458                     |
| Blood type                         | ABO HBGG | Frameshift*             | G258 deletion                 | Small indel   | rs8176719   | 2121736, 18629539                                          |
| Blood type                         | ABO HBGG | Frameshift*             | G258 deletion                 | Small indel   | rs8176719   | 2121736, 18629539                                          |
| Blood type                         | ABO HBGG | Frameshift              | G insertion in GGGGGGG795_801 | Homopolymer   | rs782782485 | 15647021, 18832934                                         |
| Blood type                         | ABO HBGG | G268R                   | G->A                          | SNP           | rs41302905  | 8484251, 18832934                                          |
| Blood type                         | ABO HBGG | Y309stop                | C->A                          | SNP           | rs782586438 | 15647021, 18832934                                         |
| Blood type                         | FUT2     | A93T                    | G->A                          | CpG           | rs112722916 | 18422843                                                   |
| Blood type                         | FUT2     | P112L                   | C->T                          | CpG           | rs200157007 | 10980544                                                   |
| Blood type                         | FUT2     | I140F                   | A->T                          | SNP           | rs1047781   | 8526839, 19487333                                          |
| Blood type                         | FUT2     | W154stop                | G->A                          | SNP           | rs601338    | 7876235, 19487333                                          |
| Blood type                         | FUT2     | R201H                   | G->A                          | CpG           | rs572832908 | 18422843                                                   |
| Blood type                         | FUT2     | R202stop                | C->T                          | CpG           | rs1800028   | 11404338, 8670215                                          |
| Blood type                         | FUT2     | R221stop                | C->T                          | CpG           | rs1800029   | 11404338                                                   |
| Blood type                         | FUT2     | R231stop*               | C->T                          | CpG           | rs144566043 | 10319583                                                   |
| Blood type                         | FUT2     | R231stop*               | C->T                          | CpG           | rs144566043 | 17089126                                                   |
| Blood type                         | FUT2     | R233C                   | C->T                          | CpG           | rs768236330 | 14569463                                                   |
| Blood type                         | FUT2     | V240M                   | G->A                          | CpG           | rs375360260 | 10980544                                                   |
| Blood type                         | FUT2     | Val241 inframe deletion | GTG718_720 deletion           | Small indel   | rs761766024 | 10980544                                                   |
| Blood type                         | FUT2     | G247S                   | G->A                          | CpG           | rs602662    | 15250822                                                   |
| Blood type                         | FUT2     | D254N                   | G->A                          | SNP           | rs768143018 | 14569463                                                   |
| Blood type                         | FUT2     | Frameshift              | CB11 deletion                 | Small indel   | rs1799761   | 9760207                                                    |
| Blood type                         | FUT2     | T284N                   | C->A                          | SNP           | rs371279676 | 22188519                                                   |
| Blood type                         | FUT2     | F291S                   | T->C                          | SNP           | CM042989    | 15250822                                                   |
| Blood type                         | FUT2     | W294stop                | G->A                          | SNP           | rs1800030   | 8670215                                                    |
| Blood type                         | FUT2     | A296T                   | G->A                          | CpG           | rs79097987  | 22188519                                                   |
| Blood type                         | FUT2     | G290R                   | G->A                          | CpG           | rs144269088 | 14569463                                                   |
| Blood type                         | FUT2     | P317L                   | C->T                          | CpG           | rs200626231 | 18422843                                                   |
| Blood type                         | FUT2     | Exon 2 deletion         | Alu-mediated 10 kb deletion   | Deletion      |             | 10982186, 19487333                                         |
| Blood type                         | FUT2     | Exon 2 deletion         | Alu-mediated 9.3 kb deletion  | Deletion      |             | 10980544, 19487333                                         |
| Blood type                         | FUT2     | Exon 2 partial deletion | Alu-mediated 4 kb deletion    | Deletion      |             | 20880207                                                   |
| Blood type                         | FUT2     | Gene fusion             | Alu-mediated 22 kb deletion   | Deletion      |             | 8755920                                                    |
| Ear wax type                       | ABCC11   | G180R                   | G->A                          | CpG           | rs17822931  | 164444273, 19710689                                        |
| Glycemia and adipolysis regulation | GIP      | S103G                   | A->G                          | SNP           | rs2291725   | 20978139                                                   |
| Hair thickness                     | EDAR     | V370A                   | T->C                          | SNP           | rs3827760   | 18065779                                                   |
| Immune system                      | IL4      | Noncoding               | C->T                          | SNP           | rs2243250   | 14654003                                                   |
| Lactose tolerance                  | LCT      | Noncoding               | C-13907G                      | SNP           | rs41525747  | 17159977                                                   |
| Lactose tolerance                  | LCT      | Noncoding               | C-13910T                      | SNP           | rs4988235   | 11788828, 17159977                                         |
| Lactose tolerance                  | LCT      | Noncoding               | T-13915G                      | SNP           | rs41380347  | 17159977                                                   |
| Lactose tolerance                  | LCT      | Noncoding               | C-14010G                      | CpG           | rs145946881 | 17159977                                                   |
| Masticatory muscles                | MTH16    | Frameshift              | Exon 18 AC deletion           | Small indel   |             | 15042088                                                   |
| Metabolism (drugs)                 | CYP2C9   | R144C                   | C->T                          | CpG           | rs1799853   | 8873220, 19300499, 20833655, 27803446                      |
| Metabolism (drugs)                 | CYP2C9   | I359L                   | A->C                          | SNP           | rs1057910   | 8873220, 19300499, 20833655, 27803446                      |
| Metabolism (environmental toxins)  | CYP2C19  | Noncoding               | C-806T                        | SNP           | rs12248560  | 16413245, 24690327                                         |
| Metabolism (environmental toxins)  | CYP2C19  | W212stop                | G->A                          | SNP           | rs4986893   | 24690327                                                   |
| Metabolism (environmental toxins)  | CYP2C19  | P227F (silent)          | G->A                          | CpG           | rs4244285   | 24690327                                                   |
| Metabolism (warfarin)              | CYP4F2   | V433M                   | G->A                          | SNP           | rs2108622   | 19300499, 20833655                                         |
| Metabolism (warfarin)              | VKORC1   | Noncoding               | G-1339A                       | CpG           | rs9923231   | 14765194, 15888487, 18252229, 19300499, 20555338, 20833655 |
| Metabolism (warfarin)              | VKORC1   | V29L                    | G->T                          | CpG           | rs104894539 | 14765194, 15888487, 18252229, 19300499, 20555338, 20833655 |
| Metabolism (warfarin)              | VKORC1   | D36Y                    | G->T                          | SNP           | rs61742245  | 14765194, 15888487, 18252229, 19300499, 20555338, 20833655 |

|                              |         |                  |                                  |  |             |              |                                                            |
|------------------------------|---------|------------------|----------------------------------|--|-------------|--------------|------------------------------------------------------------|
| Metabolism (warfarin)        | VKORC1  | V45A             | T->C                             |  | SNP         | rs104894540  | 14765194, 15888487, 18252229, 19300499, 20555338, 20833655 |
| Metabolism (warfarin)        | VKORC1  | R58G             | A->G                             |  | SNP         | rs104894541  | 14765194, 15888487, 18252229, 19300499, 20555338, 20833655 |
| Metabolism (warfarin)        | VKORC1  | V66M             | G->A                             |  | SNP         | rs72547529   | 14765194, 15888487, 18252229, 19300499, 20555338, 20833655 |
| Metabolism (warfarin)        | VKORC1  | R98W*            | C->T                             |  | CpG         | rs72547528   | 14765194, 15888487, 18252229, 19300499, 20555338, 20833655 |
| Metabolism (warfarin)        | VKORC1  | R98W*            | C->T                             |  | CpG         | rs72547528   | 14765194, 15888487, 18252229, 19300499, 20555338, 20833655 |
| Metabolism (warfarin)        | VKORC1  | L128R            | T->G                             |  | SNP         | rs104894542  | 14765194, 15888487, 18252229, 19300499, 20555338, 20833655 |
| Neuronal maturation          | SRGAP2B | Gene duplication | 258 kb interspersed duplication  |  | Duplication |              | 22559943, 22559944                                         |
| Neuronal maturation          | SRGAP2C | Gene duplication | >515 kb interspersed duplication |  | Duplication |              | 22559943, 22559944                                         |
| Olfaction                    | ORTD4   | P79L             | C->T                             |  | SNP         | rs61732668   | 22559943, 22559944                                         |
| Olfaction                    | ORTD4   | N84S             | A->G                             |  | SNP         | rs5020280    | 17873857, 19955411                                         |
| Olfaction                    | ORTD4   | R88W             | C->T                             |  | CpG         | rs61729907   | 17873857, 19955411                                         |
| Olfaction                    | ORTD4   | T133M            | C->T                             |  | CpG         | rs5020278    | 17873857, 19955411                                         |
| Pain response                | COMT    | H62H (silent)    | C->T                             |  | CpG         | rs4633       | 17185601                                                   |
| Pain response                | COMT    | L136L (silent)   | G->C                             |  | SNP         | rs4818       | 17185601                                                   |
| Pain response                | COMT    | V158M            | G->A                             |  | CpG         | rs4680       | 17185601                                                   |
| Pathogen response (HIV)      | CC13L1  | Gene duplication | >14 kb tandem duplication        |  | Duplication |              | 15637236                                                   |
| Pathogen response (malaria)  | DARC    | Noncoding        | T48C                             |  | SNP         | rs1800846    | 7663520                                                    |
| Pathogen response (malaria)  | HBB     | E6V              | A->T                             |  | SNP         | rs334        | 19465909                                                   |
| Pathogen response (malaria)  | G6PD    | H32R             | A->G                             |  | SNP         | rs137852340  | 17978087, 16607506                                         |
| Pathogen response (malaria)  | G6PD    | A44G             | C->G                             |  | SNP         | rs78478128   | 17978087, 8533762                                          |
| Pathogen response (malaria)  | G6PD    | V68M             | G->A                             |  | CpG         | rs1050828    | 17978087, 8533762                                          |
| Pathogen response (malaria)  | G6PD    | Y70H             | T->C                             |  | SNP         | rs137852349  | 17233850                                                   |
| Pathogen response (malaria)  | G6PD    | N126D            | A->G                             |  | SNP         | rs1050829    | 17978087, 11423617                                         |
| Pathogen response (malaria)  | G6PD    | L128P            | T->C                             |  | SNP         | rs78365220   | 17978087                                                   |
| Pathogen response (malaria)  | G6PD    | G131V            | G->T                             |  | SNP         | rs137852341  | 16607506                                                   |
| Pathogen response (malaria)  | G6PD    | G163S            | G->A                             |  | SNP         | rs137852314  | 17978087, 20007901                                         |
| Pathogen response (malaria)  | G6PD    | D181V            | A->T                             |  | SNP         | rs5030872    | 17978087, 12367584, 1999409, 16461316                      |
| Pathogen response (malaria)  | G6PD    | S188F            | C->T                             |  | SNP         | rs5030868    | 17978087, 11423617                                         |
| Pathogen response (malaria)  | G6PD    | R198C            | C->T                             |  | CpG         | CO.SM3559803 | 1551674, 16607506                                          |
| Pathogen response (malaria)  | G6PD    | R198H            | G->A                             |  | CpG         | rs782583168  | 18043863                                                   |
| Pathogen response (malaria)  | G6PD    | D282H            | G->C                             |  | SNP         | rs137852318  | 17978087, 12367584                                         |
| Pathogen response (malaria)  | G6PD    | V291M            | G->A                             |  | SNP         | rs137852327  | 17978087, 16136268                                         |
| Pathogen response (malaria)  | G6PD    | E317K            | G->A                             |  | CpG         | rs137852339  | 17978087, 5673160                                          |
| Pathogen response (malaria)  | G6PD    | G6PD             | T->C                             |  | SNP         | rs76723693   | 17978087, 5673160                                          |
| Pathogen response (malaria)  | G6PD    | A335T            | G->A                             |  | CpG         | rs5030869    | 17978087, 12028056                                         |
| Pathogen response (malaria)  | G6PD    | R454H            | G->A                             |  | CpG         | rs137852324  | 2393028, 16088936                                          |
| Pathogen response (malaria)  | G6PD    | R454C            | C->T                             |  | CpG         | rs398123546  | 16607506, 16088936                                         |
| Pathogen response (malaria)  | G6PD    | R459L            | G->T                             |  | CpG         | rs72554665   | 17978087, 16607506                                         |
| Pathogen response (malaria)  | G6PD    | R459P            | G->C                             |  | SNP         | rs72554665   | 12028056, 16143877                                         |
| Pathogen response (malaria)  | G6PD    | R463H            | G->A                             |  | CpG         | rs72554664   | 17978087, 16607506                                         |
| Pigmentation (eyes and skin) | OCA2    | Noncoding        | A->G                             |  | SNP         | rs12913832   | 18172690, 18483556, 22234890                               |
| Pigmentation (skin)          | SLC24A5 | A111T            | G->A                             |  | CpG         | rs1426654    | 16357253, 16524431, 18166528, 22198722                     |
| Pigmentation (skin)          | TYRP1   | R93C             | C->T                             |  | CpG         | rs387907171  | 22556244                                                   |
| Starch digestion             | AMY1    | Gene duplication | >18 Kb tandem duplication        |  | Duplication |              | 17828263                                                   |

\* Likely arose multiple times independently

**Table S2.**

Overlap of ecology-associated CNVs with different types of dinucleotide repeats.

Table S2

| EcoCNV type | Total | Near TG repeats |         | Near TC repeats |         | Near TA repeats |         |
|-------------|-------|-----------------|---------|-----------------|---------|-----------------|---------|
|             |       | Number          | Percent | Number          | Percent | Number          | Percent |
| All         | 6664  | 693             | 10.4%   | 90              | 1.4%    | 221             | 3.3%    |
| Deletions   | 659   | 98              | 14.9% * | 16              | 2.4%    | 19              | 2.9%    |
| Insertions  | 5224  | 521             | 10.0%   | 67              | 1.3%    | 165             | 3.2%    |
| Other       | 781   | 74              | 9.5%    | 7               | 0.9%    | 37              | 4.7%    |

"Near" defined as overlapping or within 1 kb

\* *P* vs. all CNVs < 9.7e-5

**Table S3.**

Yeast strains used and generated in this study.

Table S3

| Name    | Background   | Genotype                                     | YAC genotype                             | Reference                 |
|---------|--------------|----------------------------------------------|------------------------------------------|---------------------------|
| CFY1700 | S288C BY4741 | <i>MATa leu2Δ0 ura3Δ0 met15Δ0 bar1Δ::KAN</i> | <i>LEU2</i>                              | Gift from C. Freudenreich |
| KXY1    | CFY1700      | <i>MATa leu2Δ0 ura3Δ0 met15Δ0 bar1Δ::KAN</i> | <i>LEU2 VS20N-Empty URA3</i>             | This study                |
| KXY61   | CFY1700      | <i>MATa leu2Δ0 ura3Δ0 met15Δ0 bar1Δ::KAN</i> | <i>LEU2 VS20N-Empty URA3</i>             | This study                |
| KXY111  | CFY1700      | <i>MATa leu2Δ0 ura3Δ0 met15Δ0 bar1Δ::KAN</i> | <i>LEU2 VS20N-Pel-RABS URA3</i>          | This study                |
| KXY118  | CFY1700      | <i>MATa leu2Δ0 ura3Δ0 met15Δ0 bar1Δ::KAN</i> | <i>LEU2 VS20N-Pel-RABS URA3</i>          | This study                |
| KXY6    | CFY1700      | <i>MATa leu2Δ0 ura3Δ0 met15Δ0 bar1Δ::KAN</i> | <i>LEU2 VS20N-Pel-LITC URA3</i>          | This study                |
| KXY67   | CFY1700      | <i>MATa leu2Δ0 ura3Δ0 met15Δ0 bar1Δ::KAN</i> | <i>LEU2 VS20N-Pel-LITC URA3</i>          | This study                |
| KXY87   | CFY1700      | <i>MATa leu2Δ0 ura3Δ0 met15Δ0 bar1Δ::KAN</i> | <i>LEU2 VS20N-Pel-BDGB URA3</i>          | This study                |
| KXY88   | CFY1700      | <i>MATa leu2Δ0 ura3Δ0 met15Δ0 bar1Δ::KAN</i> | <i>LEU2 VS20N-Pel-BDGB URA3</i>          | This study                |
| KXY14   | CFY1700      | <i>MATa leu2Δ0 ura3Δ0 met15Δ0 bar1Δ::KAN</i> | <i>LEU2 VS20N-Pel-TOAD URA3</i>          | This study                |
| KXY74   | CFY1700      | <i>MATa leu2Δ0 ura3Δ0 met15Δ0 bar1Δ::KAN</i> | <i>LEU2 VS20N-Pel-TOAD URA3</i>          | This study                |
| KXY43   | CFY1700      | <i>MATa leu2Δ0 ura3Δ0 met15Δ0 bar1Δ::KAN</i> | <i>LEU2 VS20N-Pel-PAXB URA3</i>          | This study                |
| KXY93   | CFY1700      | <i>MATa leu2Δ0 ura3Δ0 met15Δ0 bar1Δ::KAN</i> | <i>LEU2 VS20N-Pel-PAXB URA3</i>          | This study                |
| KXY112  | CFY1700      | <i>MATa leu2Δ0 ura3Δ0 met15Δ0 bar1Δ::KAN</i> | <i>LEU2 VS20N-Pel-RABS(RC) URA3</i>      | This study                |
| KXY113  | CFY1700      | <i>MATa leu2Δ0 ura3Δ0 met15Δ0 bar1Δ::KAN</i> | <i>LEU2 VS20N-Pel-RABS(RC) URA3</i>      | This study                |
| KXY110  | CFY1700      | <i>MATa leu2Δ0 ura3Δ0 met15Δ0 bar1Δ::KAN</i> | <i>LEU2 VS20N-Pel-LITC(RC) URA3</i>      | This study                |
| KXY123  | CFY1700      | <i>MATa leu2Δ0 ura3Δ0 met15Δ0 bar1Δ::KAN</i> | <i>LEU2 VS20N-Pel-LITC(RC) URA3</i>      | This study                |
| KXY96   | CFY1700      | <i>MATa leu2Δ0 ura3Δ0 met15Δ0 bar1Δ::KAN</i> | <i>LEU2 VS20N-Pel-BDGB(RC) URA3</i>      | This study                |
| KXY97   | CFY1700      | <i>MATa leu2Δ0 ura3Δ0 met15Δ0 bar1Δ::KAN</i> | <i>LEU2 VS20N-Pel-BDGB(RC) URA3</i>      | This study                |
| KXY179  | CFY1700      | <i>MATa leu2Δ0 ura3Δ0 met15Δ0 bar1Δ::KAN</i> | <i>LEU2 VS20NR-Empty URA3</i>            | This study                |
| KXY180  | CFY1700      | <i>MATa leu2Δ0 ura3Δ0 met15Δ0 bar1Δ::KAN</i> | <i>LEU2 VS20NR-Empty URA3</i>            | This study                |
| KXY182  | CFY1700      | <i>MATa leu2Δ0 ura3Δ0 met15Δ0 bar1Δ::KAN</i> | <i>LEU2 VS20NR-Pel-RABS URA3</i>         | This study                |
| KXY183  | CFY1700      | <i>MATa leu2Δ0 ura3Δ0 met15Δ0 bar1Δ::KAN</i> | <i>LEU2 VS20NR-Pel-RABS URA3</i>         | This study                |
| KXY187  | CFY1700      | <i>MATa leu2Δ0 ura3Δ0 met15Δ0 bar1Δ::KAN</i> | <i>LEU2 VS20NR-Pel-RABS(RC) URA3</i>     | This study                |
| KXY189  | CFY1700      | <i>MATa leu2Δ0 ura3Δ0 met15Δ0 bar1Δ::KAN</i> | <i>LEU2 VS20NR-Pel-RABS(RC) URA3</i>     | This study                |
| KXY191  | CFY1700      | <i>MATa leu2Δ0 ura3Δ0 met15Δ0 bar1Δ::KAN</i> | <i>LEU2 VS20N-Empty(+ori) URA3</i>       | This study                |
| KXY192  | CFY1700      | <i>MATa leu2Δ0 ura3Δ0 met15Δ0 bar1Δ::KAN</i> | <i>LEU2 VS20N-Empty(+ori) URA3</i>       | This study                |
| KXY121  | CFY1700      | <i>MATa leu2Δ0 ura3Δ0 met15Δ0 bar1Δ::KAN</i> | <i>LEU2 VS20N-Pel-RABS(+ori) URA3</i>    | This study                |
| KXY122  | CFY1700      | <i>MATa leu2Δ0 ura3Δ0 met15Δ0 bar1Δ::KAN</i> | <i>LEU2 VS20N-Pel-RABS(+ori) URA3</i>    | This study                |
| KXY128  | CFY1700      | <i>MATa leu2Δ0 ura3Δ0 met15Δ0 bar1Δ::KAN</i> | <i>LEU2 VS20N-Pel-RABS(RC+ori) URA3</i>  | This study                |
| KXY129  | CFY1700      | <i>MATa leu2Δ0 ura3Δ0 met15Δ0 bar1Δ::KAN</i> | <i>LEU2 VS20N-Pel-RABS(RC+ori) URA3</i>  | This study                |
| KXY108  | CFY1700      | <i>MATa leu2Δ0 ura3Δ0 met15Δ0 bar1Δ::KAN</i> | <i>LEU2 VS20N-(TG)<sub>14</sub> URA3</i> | This study                |
| KXY125  | CFY1700      | <i>MATa leu2Δ0 ura3Δ0 met15Δ0 bar1Δ::KAN</i> | <i>LEU2 VS20N-(TG)<sub>14</sub> URA3</i> | This study                |
| KXY126  | CFY1700      | <i>MATa leu2Δ0 ura3Δ0 met15Δ0 bar1Δ::KAN</i> | <i>LEU2 VS20N-(TG)<sub>43</sub> URA3</i> | This study                |
| KXY127  | CFY1700      | <i>MATa leu2Δ0 ura3Δ0 met15Δ0 bar1Δ::KAN</i> | <i>LEU2 VS20N-(TG)<sub>43</sub> URA3</i> | This study                |
| KXY109  | CFY1700      | <i>MATa leu2Δ0 ura3Δ0 met15Δ0 bar1Δ::KAN</i> | <i>LEU2 VS20N-(TG)<sub>79</sub> URA3</i> | This study                |
| KXY120  | CFY1700      | <i>MATa leu2Δ0 ura3Δ0 met15Δ0 bar1Δ::KAN</i> | <i>LEU2 VS20N-(TG)<sub>79</sub> URA3</i> | This study                |
| KXY106  | CFY1700      | <i>MATa leu2Δ0 ura3Δ0 met15Δ0 bar1Δ::KAN</i> | <i>LEU2 VS20N-(CA)<sub>16</sub> URA3</i> | This study                |
| KXY107  | CFY1700      | <i>MATa leu2Δ0 ura3Δ0 met15Δ0 bar1Δ::KAN</i> | <i>LEU2 VS20N-(CA)<sub>16</sub> URA3</i> | This study                |
| KXY104  | CFY1700      | <i>MATa leu2Δ0 ura3Δ0 met15Δ0 bar1Δ::KAN</i> | <i>LEU2 VS20N-(CA)<sub>50</sub> URA3</i> | This study                |
| KXY105  | CFY1700      | <i>MATa leu2Δ0 ura3Δ0 met15Δ0 bar1Δ::KAN</i> | <i>LEU2 VS20N-(CA)<sub>50</sub> URA3</i> | This study                |

**Table S4.**

Detailed yeast artificial chromosome assay breakage rates.

Table S4

| Ecotype    | YAC context | Test sequence | Breaks per division | Breaks per division<br>(construct average) | Fold above empty*<br>(construct average) | Figure reference |
|------------|-------------|---------------|---------------------|--------------------------------------------|------------------------------------------|------------------|
| Marine     | BDGB        | Empty vector  | 6.42E-06            | 3.37E-06                                   | 1.00                                     | 2B, 2C, 3C       |
|            |             |               | 2.99E-06            | "                                          | "                                        | "                |
|            |             |               | 1.79E-08            | "                                          | "                                        | "                |
|            |             |               | 8.47E-07            | "                                          | "                                        | "                |
|            |             |               | 4.05E-06            | "                                          | "                                        | "                |
| "          | "           | "             | 5.90E-06            | "                                          | "                                        | "                |
| Marine     | LITC        | "             | 6.32E-05            | 9.54E-05                                   | 28.31                                    | 2B               |
|            |             |               | 1.01E-04            | "                                          | "                                        | "                |
|            |             |               | 3.61E-05            | "                                          | "                                        | "                |
|            |             |               | 5.15E-05            | "                                          | "                                        | "                |
|            |             |               | 1.69E-04            | "                                          | "                                        | "                |
| "          | "           | "             | 1.52E-04            | "                                          | "                                        | "                |
| Marine     | RABS        | "             | 2.46E-04            | 1.94E-04                                   | 57.70                                    | 2B               |
|            |             |               | 2.30E-04            | "                                          | "                                        | "                |
|            |             |               | 1.31E-04            | "                                          | "                                        | "                |
|            |             |               | 1.37E-04            | "                                          | "                                        | "                |
|            |             |               | 1.80E-04            | "                                          | "                                        | "                |
| "          | "           | "             | 2.43E-04            | "                                          | "                                        | "                |
| Marine     | RABS        | "             | 1.15E-04            | 1.15E-04                                   | 34.12                                    | 2B, 2C           |
|            |             |               | 1.09E-04            | "                                          | "                                        | "                |
|            |             |               | 7.82E-05            | "                                          | "                                        | "                |
|            |             |               | 4.64E-05            | "                                          | "                                        | "                |
|            |             |               | 8.45E-05            | "                                          | "                                        | "                |
| "          | "           | "             | 2.57E-04            | "                                          | "                                        | "                |
| Freshwater | TOAD        | "             | 7.96E-06            | 8.05E-06                                   | 2.39                                     | 2B               |
|            |             |               | 9.92E-06            | "                                          | "                                        | "                |
|            |             |               | 9.35E-06            | "                                          | "                                        | "                |
|            |             |               | 6.41E-06            | "                                          | "                                        | "                |
|            |             |               | 7.92E-06            | "                                          | "                                        | "                |
| "          | "           | "             | 6.75E-06            | "                                          | "                                        | "                |
| Freshwater | PAXB        | "             | 7.61E-07            | 3.01E-06                                   | 0.89                                     | 2B               |
|            |             |               | 1.01E-06            | "                                          | "                                        | "                |
|            |             |               | 3.38E-06            | "                                          | "                                        | "                |
|            |             |               | 1.53E-06            | "                                          | "                                        | "                |
|            |             |               | 1.36E-06            | "                                          | "                                        | "                |



|        |                                                |          |          |       |        |   |
|--------|------------------------------------------------|----------|----------|-------|--------|---|
| "      | "                                              | 1.00E-05 | "        | "     | "      | " |
| Marine | BDGB reverse complement                        | 3.69E-06 | 1.13E-05 | 3.34  | 2B     | " |
| "      | "                                              | 5.74E-06 | "        | "     | "      | " |
| "      | "                                              | 1.01E-05 | "        | "     | "      | " |
| "      | "                                              | 2.17E-05 | "        | "     | "      | " |
| "      | "                                              | 2.33E-05 | "        | "     | "      | " |
| "      | "                                              | 3.09E-06 | "        | "     | "      | " |
| Marine | LITC reverse complement                        | 8.91E-06 | 9.77E-06 | 2.90  | 2B     | " |
| "      | "                                              | 3.44E-06 | "        | "     | "      | " |
| "      | "                                              | 4.97E-06 | "        | "     | "      | " |
| "      | "                                              | 2.25E-06 | "        | "     | "      | " |
| "      | "                                              | 2.15E-05 | "        | "     | "      | " |
| "      | "                                              | 1.75E-05 | "        | "     | "      | " |
| Marine | RABS reverse complement                        | 4.07E-06 | 7.06E-06 | 2.09  | 2B, 2C | " |
| "      | "                                              | 9.28E-06 | "        | "     | "      | " |
| "      | "                                              | 7.47E-06 | "        | "     | "      | " |
| "      | "                                              | 1.12E-06 | "        | "     | "      | " |
| "      | "                                              | 2.91E-06 | "        | "     | "      | " |
| "      | "                                              | 1.75E-05 | "        | "     | "      | " |
|        | Reversed transcription Empty vector            | 3.65E-06 | 8.29E-06 | 1.00  | 2C     | " |
|        | "                                              | 6.83E-06 | "        | "     | "      | " |
|        | "                                              | 2.16E-06 | "        | "     | "      | " |
|        | "                                              | 9.17E-06 | "        | "     | "      | " |
|        | "                                              | 1.01E-05 | "        | "     | "      | " |
|        | "                                              | 1.78E-05 | "        | "     | "      | " |
| Marine | Reversed transcription RABS                    | 1.48E-04 | 1.99E-04 | 23.96 | 2C     | " |
| "      | "                                              | 2.90E-04 | "        | "     | "      | " |
| "      | "                                              | 3.59E-04 | "        | "     | "      | " |
| "      | "                                              | 1.55E-04 | "        | "     | "      | " |
| "      | "                                              | 9.93E-05 | "        | "     | "      | " |
| "      | "                                              | 1.41E-04 | "        | "     | "      | " |
| Marine | Reversed transcription RABS reverse complement | 8.50E-06 | 1.37E-05 | 1.65  | 2C     | " |
| "      | "                                              | 9.17E-06 | "        | "     | "      | " |
| "      | "                                              | 1.09E-05 | "        | "     | "      | " |
| "      | "                                              | 1.41E-05 | "        | "     | "      | " |
| "      | "                                              | 1.14E-05 | "        | "     | "      | " |
| "      | "                                              | 2.82E-05 | "        | "     | "      | " |
|        | Reversed replication Empty vector              | 7.98E-07 | 1.43E-06 | 1.00  | 2C     | " |

|        |                      |                         |   |          |          |       |    |   |   |
|--------|----------------------|-------------------------|---|----------|----------|-------|----|---|---|
| "      | "                    | "                       | " | 1.18E-06 | "        | "     | "  | " | " |
| "      | "                    | "                       | " | 2.14E-06 | "        | "     | "  | " | " |
| "      | "                    | "                       | " | 9.81E-07 | "        | "     | "  | " | " |
| "      | "                    | "                       | " | 6.01E-07 | "        | "     | "  | " | " |
| "      | "                    | "                       | " | 2.88E-06 | "        | "     | "  | " | " |
| Marine | Reversed replication | RABS                    |   | 7.04E-07 | 1.06E-06 | 0.74  | 2C |   |   |
| "      | "                    | "                       | " | 9.35E-07 | "        | "     | "  | " | " |
| "      | "                    | "                       | " | 3.50E-07 | "        | "     | "  | " | " |
| "      | "                    | "                       | " | 2.10E-06 | "        | "     | "  | " | " |
| "      | "                    | "                       | " | 1.61E-06 | "        | "     | "  | " | " |
| "      | "                    | "                       | " | 6.52E-07 | "        | "     | "  | " | " |
| Marine | Reversed replication | RABS reverse complement |   | 5.26E-05 | 2.37E-05 | 16.55 | 2C |   |   |
| "      | "                    | "                       | " | 1.99E-05 | "        | "     | "  | " | " |
| "      | "                    | "                       | " | 1.41E-05 | "        | "     | "  | " | " |
| "      | "                    | "                       | " | 1.70E-05 | "        | "     | "  | " | " |
| "      | "                    | "                       | " | 1.50E-05 | "        | "     | "  | " | " |
| "      | "                    | "                       | " | 2.33E-05 | "        | "     | "  | " | " |
|        | (TG)14               |                         |   | 9.25E-06 | 1.57E-05 | 4.67  | 3C |   |   |
| "      | "                    | "                       | " | 1.90E-05 | "        | "     | "  | " | " |
| "      | "                    | "                       | " | 5.34E-06 | "        | "     | "  | " | " |
| "      | "                    | "                       | " | 1.16E-05 | "        | "     | "  | " | " |
| "      | "                    | "                       | " | 1.86E-05 | "        | "     | "  | " | " |
| "      | "                    | "                       | " | 3.06E-05 | "        | "     | "  | " | " |
|        | (TG)43               |                         |   | 1.16E-04 | 1.04E-04 | 30.90 | 3C |   |   |
| "      | "                    | "                       | " | 1.66E-04 | "        | "     | "  | " | " |
| "      | "                    | "                       | " | 1.19E-04 | "        | "     | "  | " | " |
| "      | "                    | "                       | " | 9.27E-05 | "        | "     | "  | " | " |
| "      | "                    | "                       | " | 6.01E-05 | "        | "     | "  | " | " |
| "      | "                    | "                       | " | 7.05E-05 | "        | "     | "  | " | " |
|        | (TG)79               |                         |   | 1.34E-04 | 1.35E-04 | 40.14 | 3C |   |   |
| "      | "                    | "                       | " | 1.69E-04 | "        | "     | "  | " | " |
| "      | "                    | "                       | " | 9.58E-05 | "        | "     | "  | " | " |
| "      | "                    | "                       | " | 1.34E-04 | "        | "     | "  | " | " |
| "      | "                    | "                       | " | 1.69E-04 | "        | "     | "  | " | " |
| "      | "                    | "                       | " | 1.10E-04 | "        | "     | "  | " | " |
|        | (CA)16               |                         |   | 7.27E-06 | 5.56E-06 | 1.65  | 3C |   |   |
| "      | "                    | "                       | " | 4.72E-06 | "        | "     | "  | " | " |
| "      | "                    | "                       | " | 1.13E-06 | "        | "     | "  | " | " |
| "      | "                    | "                       | " | 4.41E-06 | "        | "     | "  | " | " |

|                          |        |          |          |       |     |   |
|--------------------------|--------|----------|----------|-------|-----|---|
| "                        | "      | 6.59E-06 | "        | "     | "   | " |
| "                        | "      | 9.16E-06 | "        | "     | "   | " |
| "                        | (CA)50 | 2.63E-06 | 4.89E-06 | 1.45  | 3C  | " |
| "                        | "      | 1.45E-06 | "        | "     | "   | " |
| "                        | "      | 6.06E-06 | "        | "     | "   | " |
| "                        | "      | 1.29E-06 | "        | "     | "   | " |
| "                        | "      | 9.81E-06 | "        | "     | "   | " |
| "                        | "      | 8.09E-06 | "        | "     | "   | " |
| Freshwater intact pelvis | NNCY   | 3.08E-04 | 2.92E-04 | 86.49 | STB | " |
| "                        | "      | 2.89E-04 | "        | "     | "   | " |
| "                        | "      | 1.81E-04 | "        | "     | "   | " |
| "                        | "      | 4.47E-04 | "        | "     | "   | " |
| "                        | "      | 1.71E-04 | "        | "     | "   | " |
| "                        | "      | 3.53E-04 | "        | "     | "   | " |
| Freshwater intact pelvis | MAYR   | 3.34E-04 | 2.19E-04 | 65.12 | STB | " |
| "                        | "      | 8.54E-05 | "        | "     | "   | " |
| "                        | "      | 2.78E-04 | "        | "     | "   | " |
| "                        | "      | 2.54E-04 | "        | "     | "   | " |
| "                        | "      | 8.54E-05 | "        | "     | "   | " |
| "                        | "      | 2.80E-04 | "        | "     | "   | " |
| Freshwater intact pelvis | MATA   | 2.37E-04 | 1.66E-04 | 49.19 | STB | " |
| "                        | "      | 6.93E-05 | "        | "     | "   | " |
| "                        | "      | 2.15E-04 | "        | "     | "   | " |
| "                        | "      | 2.09E-04 | "        | "     | "   | " |
| "                        | "      | 6.36E-05 | "        | "     | "   | " |
| "                        | "      | 2.01E-04 | "        | "     | "   | " |

\* Calculated as (construct average)/(empty vector average), except for reversed transcription/replication constructs, where the paired empty vector construct average was used

**Table S5.**

Detailed yeast artificial chromosome assay p-value comparisons.

Table S5

| Two sample tests vs. Empty vector                                                           | Wilcoxon            | t test            |
|---------------------------------------------------------------------------------------------|---------------------|-------------------|
| Empty vs Marine*                                                                            | 0.000015            | 0.0002            |
| Empty vs Freshwater*                                                                        | 0.179703            | 0.2198            |
| Empty vs Marine RC*                                                                         | 0.077220            | 0.0715            |
| Empty vs BDGB                                                                               | 0.002165            | 0.0022            |
| Empty vs LITC                                                                               | 0.002165            | < 0.0001          |
| Empty vs RABS                                                                               | 0.002165            | 0.0041            |
| Empty vs TOAD**                                                                             | 0.004329            | 0.0030            |
| Empty vs PAXB                                                                               | 0.818182            | 0.8436            |
| Empty vs BDGB RC                                                                            | 0.132035            | 0.0671            |
| Empty vs LITC RC                                                                            | 0.179654            | 0.0915            |
| Empty vs RABS RC                                                                            | 0.240260            | 0.1931            |
| Empty vs (TG)14                                                                             | 0.008658            | 0.0091            |
| Empty vs (TG)43                                                                             | 0.002165            | < 0.0001          |
| Empty vs (TG)79                                                                             | 0.004922            | < 0.0001          |
| Empty vs (CA)16                                                                             | 0.132035            | 0.1919            |
| Empty vs (CA)50                                                                             | 0.484848            | 0.4244            |
| Reverse transcription Empty vs Reverse transcription RABS                                   | 0.002165            | 0.0010            |
| Reverse transcription Empty vs Reverse transcription RABS RC                                | 0.148829            | 0.1808            |
| Reverse replication Empty vs Reverse replication RABS                                       | 0.393939            | 0.4312            |
| Reverse replication Empty vs Reverse replication RABS RC                                    | 0.002165            | 0.0039            |
| Empty vs Freshwater intact pelvis*                                                          | 0.000360            | < 0.0001          |
| Empty vs NNCY                                                                               | 0.002165            | < 0.0001          |
| Empty vs MAYR                                                                               | 0.004998            | 0.0006            |
| Empty vs MATA                                                                               | 0.002165            | 0.0005            |
| <hr/>                                                                                       |                     |                   |
| Multiple sample tests with post-hoc multiple comparison***                                  | Kruskal-Wallis****  | ANOVA ****        |
| <b>Fig. 2B (Empty, Marine, Freshwater, Marine RC)</b>                                       | <b>4.084781e-08</b> | <b>1.3504e-12</b> |
| Empty vs Marine*                                                                            | 0.000016            | 0.0010053         |
| Empty vs Freshwater*                                                                        | 0.448108            | 0.8999947         |
| Empty vs Marine RC*                                                                         | 0.213415            | 0.8999947         |
| Marine* vs. Freshwater*                                                                     | 0.000010            | 0.0010053         |
| Marine* vs. Marine RC*                                                                      | 0.000016            | 0.0010053         |
| Freshwater* vs. Marine RC*                                                                  | 0.472054            | 0.8999947         |
| <b>Conclusion: Marine is significantly different from rest of group</b>                     |                     |                   |
| <b>Fig. 2C (Empty, RABS, RABS RC)</b>                                                       | <b>0.002338</b>     | <b>0.0005</b>     |
| Empty vs RABS                                                                               | 0.002402            | 0.0011008         |
| Empty vs RABS RC                                                                            | 0.386940            | 0.8999947         |
| RABS vs RABS RC                                                                             | 0.025736            | 0.0014785         |
| <b>Conclusion: RABS is significantly different from rest of group</b>                       |                     |                   |
| <b>Fig. 2C (Reverse transcription: Empty, RABS, RABS RC)</b>                                | <b>0.001992</b>     | <b>5.4254e-05</b> |
| Reverse transcription Empty vs Reverse transcription RABS                                   | 0.001775            | 0.0010053         |
| Reverse transcription Empty vs Reverse transcription RABS RC                                | 0.303981            | 0.8999947         |
| Reverse transcription RABS vs. Reverse transcription RABS RC                                | 0.032122            | 0.0010053         |
| <b>Conclusion: Reverse transcription RABS is significantly different from rest of group</b> |                     |                   |
| <b>Fig. 2C (Reverse replication: Empty, RABS, RABS RC)</b>                                  | <b>0.002754</b>     | <b>0.0004</b>     |

|                                                                                              |          |           |
|----------------------------------------------------------------------------------------------|----------|-----------|
| Reverse replication Empty vs Reverse replication RABS                                        | 0.516412 | 0.8999947 |
| Reverse replication Empty vs Reverse replication RABS RC                                     | 0.014166 | 0.0010270 |
| Reverse replication RABS vs Reverse replication RABS RC                                      | 0.003531 | 0.0010053 |
| <b>Conclusion: Reverse replication RABS RC is significantly different from rest of group</b> |          |           |

---

All calculations were made using the median values reported in table S5  
 Grey indicates not significant ( $p > 0.05$ )

\* Marine indicates median values from BDGB, LITC, and RABS combined  
 Freshwater indicates median values from TOAD and PAXB combined  
 Marine RC indicates median values from BDGB RC, LITC RC, and RABS RC combined  
 Freshwater intact pelvis indicates median values from NNCY, MAYR, and MATA combined

\*\* The TOAD deletion allele retains a (TG)<sub>15</sub> stretch (file S1)

\*\*\* Comparison groupings are indicated in bold; bolded p-values indicate overall p-value without post-hoc analysis;  
 unbolded p-values indicate p-values from post-hoc pairwise multiple comparison

\*\*\*\* Kruskal-Wallis with post-hoc Dunn p-values, further adjusted by the Benjamini-Hochberg False Discovery Rate method  
 ANOVA with post-hoc Tukey Honest Significant Difference p-values

**Table S6.**

Stickleback populations used in this study.

Table S6

| Acronym | Population            | Ecology    | Pelvic phenotype | Location                 | N Latitude | W Longitude |
|---------|-----------------------|------------|------------------|--------------------------|------------|-------------|
| BDGB    | Bodega Bay            | Marine     | Full             | USA, California          | 38.325     | 123.041     |
| BEPA    | Bear Paw Lake         | Freshwater | Reduced          | USA, Alaska              | 61.614     | 149.756     |
| BOOT    | Boot Lake             | Freshwater | Reduced          | USA, Alaska              | 61.717     | 150.117     |
| BOUL    | Boulton Lake          | Freshwater | Reduced          | Canada, British Columbia | 53.783     | 132.098     |
| CMCB    | Community Club Pond   | Freshwater | Reduced          | USA, Alaska              | 60.702     | 151.383     |
| HUMP    | Hump Lake             | Freshwater | Reduced          | USA, Alaska              | 60.769     | 151.167     |
| JADE    | Jade Lake             | Freshwater | Full             | USA, Alaska              | 61.524     | 149.869     |
| KFSY    | Kalifonsky Lake       | Freshwater | Reduced          | USA, Alaska              | 60.331     | 151.264     |
| LITC    | Little Campbell River | Marine     | Full             | Canada, British Columbia | 49.018     | 122.779     |
| LSHP    | L-Shaped Lake         | Freshwater | Reduced          | USA, Alaska              | 61.706     | 149.972     |
| MATA    | Matadero              | Freshwater | Full             | USA, California          | 37.386     | 122.165     |
| MAYR    | Mayer                 | Freshwater | Full             | Canada, British Columbia | 53.644     | 132.057     |
| NNCY    | Nancy                 | Freshwater | Full             | USA, Alaska              | 61.685     | 150.000     |
| ORPH    | Orphea Lake           | Freshwater | Reduced          | USA, Alaska              | 60.386     | 151.200     |
| PAXB    | Paxton Lake (Benthic) | Freshwater | Reduced          | Canada, British Columbia | 49.712     | 124.525     |
| RABS    | Rabbit Slough         | Marine     | Full             | USA, Alaska              | 61.537     | 149.166     |
| TOAD    | Toad Lake             | Freshwater | Reduced          | USA, Alaska              | 61.619     | 149.696     |



## REFERENCES AND NOTES

1. D. Schluter, E. A. Clifford, M. Nemethy, J. S. McKinnon, Parallel evolution and inheritance of quantitative traits. *Am Nat* **163**, 809-822 (2004).
2. D. L. Stern, V. Orgogozo, Is genetic evolution predictable? *Science* **323**, 746-751 (2009).
3. M. A. Bell, Interacting evolutionary constraints in pelvic reduction of threespine sticklebacks, *Gasterosteus aculeatus* (Pisces, Gasterosteidae). *Biol J Linn Soc* **31**, 347-382 (1987).
4. T. E. Reimchen, Spine deficiency and polymorphism in a population of *Gasterosteus aculeatus*: an adaptation to predators? *Can J Zool* **58**, 1232-1244 (1980).
5. M. A. Bell, G. Orti, J. A. Walker, J. P. Koenings, Evolution of pelvic reduction in threespine stickleback fish: a test of competing hypotheses. *Evolution* **47**, 906-914 (1993).
6. Y. F. Chan *et al.*, Adaptive evolution of pelvic reduction in sticklebacks by recurrent deletion of a Pitx1 enhancer. *Science* **327**, 302-305 (2010).
7. M. Karhunen, J. Merila, T. Leinonen, J. M. Cano, O. Ovaskainen, DRIFTSEL: an R package for detecting signals of natural selection in quantitative traits. *Mol Ecol Resour* **13**, 746-754 (2013).
8. B. Prud'homme *et al.*, Repeated morphological evolution through cis-regulatory changes in a pleiotropic gene. *Nature* **440**, 1050-1053 (2006).
9. D. L. Stern, N. Frankel, The structure and evolution of cis-regulatory regions: the shavenbaby story. *Philos T R Soc B* **368**, (2013).
10. R. G. Thys, C. E. Lehman, L. C. Pierce, Y. H. Wang, DNA secondary structure at chromosomal fragile sites in human disease. *Curr Genomics* **16**, 60-70 (2015).
11. R. Bowater, F. Aboul-Ela, D. M. Lilley, Two-dimensional gel electrophoresis of circular DNA topoisomers. *Methods Enzymol* **212**, 105-120 (1992).
12. A. Nordheim, A. Rich, The sequence (dC-dA)<sub>n</sub> X (dG-dT)<sub>n</sub> forms left-handed Z-DNA in negatively supercoiled plasmids. *Proc Natl Acad Sci USA* **80**, 1821-1825 (1983).
13. A. Rich, A. Nordheim, A. H. Wang, The chemistry and biology of left-handed Z-DNA. *Annu Rev Biochem* **53**, 791-846 (1984).

14. H. Zhang, C. H. Freudenreich, An AT-rich sequence in human common fragile site FRA16D causes fork stalling and chromosome breakage in *S. cerevisiae*. *Mol Cell* **27**, 367-379 (2007).
15. A. Helmrich, M. Ballarino, L. Tora, Collisions between replication and transcription complexes cause common fragile site instability at the longest human genes. *Mol Cell* **44**, 966-977 (2011).
16. G. Wang, L. A. Christensen, K. M. Vasquez, Z-DNA-forming sequences generate large-scale deletions in mammalian cells. *Proc Natl Acad Sci USA* **103**, 2677-2682 (2006).
17. G. Wang, S. Carbajal, J. Vijg, J. DiGiovanni, K. M. Vasquez, DNA structure-induced genomic instability in vivo. *J Natl Cancer Inst* **100**, 1815-1817 (2008).
18. H. Hamada, M. G. Petrino, T. Kakunaga, M. Seidman, B. D. Stollar, Characterization of genomic poly(dT-dG).poly(dC-dA) sequences: structure, organization, and conformation. *Mol Cell Biol* **4**, 2610-2621 (1984).
19. G. Wang, K. M. Vasquez, Naturally occurring H-DNA-forming sequences are mutagenic in mammalian cells. *Proc Natl Acad Sci USA* **101**, 13448-13453 (2004).
20. N. Rhind, D. M. Gilbert, DNA replication timing. *Cold Spring Harb Perspect Biol* **5**, a010132 (2013).
21. M. Kimura, On the probability of fixation of mutant genes in a population. *Genetics* **47**, 713-719 (1962).
22. P. F. Colosimo *et al.*, Widespread parallel evolution in sticklebacks by repeated fixation of Ectodysplasin alleles. *Science* **307**, 1928-1933 (2005).
23. R. D. Barrett, D. Schluter, Adaptation from standing genetic variation. *Trends Ecol Evol* **23**, 38-44 (2008).
24. 1000\_Genomes\_Project\_Consortium, A global reference for human genetic variation. *Nature* **526**, 68-74 (2015).
25. R. Moxon, C. Bayliss, D. Hood, Bacterial contingency loci: the role of simple sequence DNA repeats in bacterial adaptation. *Annu Rev Genet* **40**, 307-333 (2006).
26. A. Stoltzfus, L. Y. Yampolsky, Climbing mount probable: mutation as a cause of nonrandomness in evolution. *J Hered* **100**, 637-647 (2009).
27. X. Du *et al.*, Potential non-B DNA regions in the human genome are associated with higher rates of nucleotide mutation and expression variation. *Nucleic Acids Res* **42**, 12367-12379 (2014).

28. S. C. Galen *et al.*, Contribution of a mutational hot spot to hemoglobin adaptation in high-altitude Andean house wrens. *Proc Natl Acad Sci USA* **112**, 13958-13963 (2015).
29. A. Bacolla, J. A. Tainer, K. M. Vasquez, D. N. Cooper, Translocation and deletion breakpoints in cancer genomes are associated with potential non-B DNA-forming sequences. *Nucleic Acids Res* **44**, 5673-5688 (2016).
30. A. D. Hargreaves *et al.*, Genome sequence of a diabetes-prone rodent reveals a mutation hotspot around the ParaHox gene cluster. *Proc Natl Acad Sci USA* **114**, 7677-7682 (2017).
31. C. B. Lowe *et al.*, Detecting copy number variation between groups of samples. *Genome Res* **28**, 256-265 (2018).
32. V. P. Schulz, V. A. Zakian, The *Saccharomyces* PIF1 DNA helicase inhibits telomere elongation and de novo telomere formation. *Cell* **76**, 145-155 (1994).
33. G. Wang, S. Gaddis, K. M. Vasquez, Methods to detect replication-dependent and replication-independent DNA structure-induced genetic instability. *Methods* **64**, 67-72 (2013).
34. K. H. Schmidt, V. Pennaneach, C. D. Putnam, R. D. Kolodner, Analysis of gross-chromosomal rearrangements in *Saccharomyces cerevisiae*. *Methods Enzymol* **409**, 462-476 (2006).
35. T. G. Montague, J. M. Cruz, J. A. Gagnon, G. M. Church, E. Valen, CHOPCHOP: a CRISPR/Cas9 and TALEN web tool for genome editing. *Nucleic Acids Res* **42**, W401-407 (2014).
36. A. N. Shah, C. F. Davey, A. C. Whitebirch, A. C. Miller, C. B. Moens, Rapid reverse genetic screening using CRISPR in zebrafish. *Nat Methods* **12**, 535-540 (2015).
37. H. Swarup, Stages in the development of the stickleback *Gasterosteus aculeatus*. *J Embryol Exp Morphol* **6**, 373-383 (1958).
38. T. Ryba *et al.*, Evolutionarily conserved replication timing profiles predict long-range chromatin interactions and distinguish closely related cell types. *Genome Res* **20**, 761-770 (2010).
39. H. Li, R. Durbin, Fast and accurate long-read alignment with Burrows-Wheeler transform. *Bioinformatics* **26**, 589-595 (2010).
40. N. Crosetto *et al.*, Nucleotide-resolution DNA double-strand break mapping by next-generation sequencing. *Nat Methods* **10**, 361-365 (2013).

41. A. Koren *et al.*, Differential relationship of DNA replication timing to different forms of human mutation and variation. *Am J Hum Genet* **91**, 1033-1040 (2012).
42. C. B. Lowe *et al.*, Three periods of regulatory innovation during vertebrate evolution. *Science* **333**, 1019-1024 (2011).
43. M. Lynch, Rate, molecular spectrum, and consequences of human mutation. *Proc Natl Acad Sci USA* **107**, 961-968 (2010).
44. C. D. Campbell, E. E. Eichler, Properties and rates of germline mutations in humans. *Trends Genet* **29**, 575-584 (2013).
45. M. A. Bell, S. A. Foster, *The evolutionary biology of the threespine stickleback*. (Oxford University Press, New York, 1994), pp. 571.
46. J. L. Rollins, Body size and growth rate divergence among populations of threespine stickleback (*Gasterosteus aculeatus*) in Cook Inlet, Alaska, USA. *Can J Zool* **95**, 877-884 (2017).
47. M. D. Shapiro *et al.*, Genetic and developmental basis of evolutionary pelvic reduction in threespine sticklebacks. *Nature* **428**, 717-723 (2004).
48. R. Frankham, Effective population size/adult population size ratios in wildlife: a review. *Genet Res* **66**, 96-107 (1995).
49. J. DeFaveri, J. Merila, Temporal stability of genetic variability and differentiation in the three-spined stickleback (*Gasterosteus aculeatus*). *PLoS One* **10**, e0123891 (2015).
50. A. Perez-Figueroa, C. Fernandez, R. Amaro, M. Hermida, E. San Miguel, Population structure and effective/census population size ratio in threatened three-spined stickleback populations from an isolated river basin in northwest Spain. *Genetica* **143**, 403-411 (2015).
51. R. D. Barrett, S. M. Rogers, D. Schluter, Natural selection on a major armor gene in threespine stickleback. *Science* **322**, 255-257 (2008).
52. G. Hunt, M. A. Bell, M. P. Travis, Evolution toward a new adaptive optimum: phenotypic evolution in a fossil stickleback lineage. *Evolution* **62**, 700-710 (2008).
53. M. Kimura, T. Ohta, The average number of generations until fixation of a mutant gene in a finite population. *Genetics* **61**, 763-771 (1969).
54. M. Kimura, The length of time required for a selectively neutral mutant to reach fixation through random frequency drift in a finite population. *Genet Res* **15**, 131-133 (1970).

55. H. Reyes-Centeno, Out of Africa and into Asia: fossil and genetic evidence on modern human origins and dispersals. *Quatern Int* **416**, 249-262 (2016).
56. A. Martin, V. Orgogozo, The loci of repeated evolution: a catalog of genetic hotspots of phenotypic variation. *Evolution* **67**, 1235-1250 (2013).
57. M. A. Bell, G. Orti, Pelvic reduction in threespine stickleback from Cook Inlet lakes: geographical distribution and intrapopulation variation. *Copeia*, 314-325 (1994).
58. I. Hiratani *et al.*, Global reorganization of replication domains during embryonic stem cell differentiation. *Plos Biol* **6**, e245 (2008).
59. J. D. McPhail, Ecology and evolution of sympatric sticklebacks (*Gasterosteus*): evidence for a species-pair in Paxton Lake, Texada Island, British Columbia. *Can J Zool* **70**, 361-369 (1992).
60. S. Saxonov, P. Berg, D. L. Brutlag, A genome-wide analysis of CpG dinucleotides in the human genome distinguishes two distinct classes of promoters. *Proc Natl Acad Sci USA* **103**, 1412-1417 (2006).
61. P. H. Sudmant *et al.*, An integrated map of structural variation in 2,504 human genomes. *Nature* **526**, 75-81 (2015).
